# Supplementary material for: N6-Adenosine Methylation in MiRNAs
Source: PubMed Central journal article supplement (PMC4344304; doi:10.1371/journal.pone.0118438), 2015-02-27
Supplement: pone.0118438.s001.pdf [file pone.0118438.s001.pdf]

**Supplementary Table 1.**

List of miRNAs with at least 15 reads per million in all three input samples (FTO1C1, FTO2D4, FTOC3) (n=876). scr, scrambled siRNA treated cells; kd, *FTO* knockdown cells.

|    | Name              | FTO1C1<br>scr | FTO2D4<br>scr | FTO3C3<br>scr | FTO1C1<br>kd | FTO2D4<br>kd | FTO3C3<br>kd |
|----|-------------------|---------------|---------------|---------------|--------------|--------------|--------------|
| 1  | hsa-let-7a-3p     | 70            | 90            | 65            | 58           | 56           | 34           |
| 2  | hsa-let-7a-5p     | 5380          | 5426          | 8314          | 2854         | 3143         | 2650         |
| 3  | hsa-let-7b-5p     | 38            | 47            | 38            | 38           | 52           | 52           |
| 4  | hsa-let-7c-5p     | 178           | 113           | 213           | 118          | 95           | 153          |
| 5  | hsa-let-7d-3p     | 35            | 32            | 92            | 18           | 22           | 33           |
| 6  | hsa-let-7d-5p     | 20            | 18            | 16            | 6            | 7            | 9            |
| 7  | hsa-let-7e-5p     | 233           | 175           | 192           | 90           | 95           | 102          |
| 8  | hsa-let-7f-2-3p   | 18            | 19            | 16            | 21           | 14           | 15           |
| 9  | hsa-let-7f-5p     | 11899         | 10729         | 9212          | 6801         | 5142         | 5993         |
| 10 | hsa-let-7g-5p     | 347           | 369           | 351           | 239          | 212          | 236          |
| 11 | hsa-let-7i-5p     | 290           | 351           | 200           | 242          | 221          | 217          |
| 12 | hsa-miR-101-3p    | 2725          | 2738          | 2397          | 1635         | 1217         | 1013         |
| 13 | hsa-miR-101-5p    | 234           | 188           | 154           | 154          | 124          | 142          |
| 14 | hsa-miR-103a-3p   | 2231          | 1747          | 2171          | 950          | 740          | 992          |
| 15 | hsa-miR-106b-3p   | 180           | 171           | 179           | 79           | 91           | 103          |
| 16 | hsa-miR-106b-5p   | 693           | 734           | 683           | 393          | 317          | 343          |
| 17 | hsa-miR-107       | 246           | 197           | 235           | 109          | 104          | 107          |
| 18 | hsa-miR-10a-3p    | 161           | 139           | 140           | 74           | 74           | 67           |
| 19 | hsa-miR-10a-5p    | 264567        | 227800        | 167204        | 101949       | 101929       | 114172       |
| 20 | hsa-miR-10b-3p    | 77            | 77            | 67            | 46           | 48           | 45           |
| 21 | hsa-miR-10b-5p    | 97412         | 75502         | 66125         | 35896        | 34826        | 42808        |
| 22 | hsa-miR-1178-5p   | 20            | 19            | 21            | 13           | 15           | 13           |
| 23 | hsa-miR-1180-3p   | 7590          | 7063          | 5843          | 2529         | 2019         | 1869         |
| 24 | hsa-miR-1180-5p   | 23            | 29            | 27            | 18           | 15           | 15           |
| 25 | hsa-miR-1181      | 25            | 38            | 39            | 27           | 30           | 25           |
| 26 | hsa-miR-1184      | 383           | 464           | 449           | 390          | 260          | 347          |
| 27 | hsa-miR-1185-1-3p | 2158          | 2622          | 5764          | 1656         | 2167         | 1810         |
| 28 | hsa-miR-1197      | 112           | 120           | 153           | 65           | 72           | 77           |
| 29 | hsa-miR-1199-5p   | 24            | 18            | 34            | 15           | 12           | 17           |
| 30 | hsa-miR-1200      | 49            | 36            | 34            | 24           | 21           | 21           |
| 31 | hsa-miR-1203      | 19            | 15            | 25            | 17           | 18           | 17           |
| 32 | hsa-miR-1204      | 260           | 225           | 773           | 105          | 127          | 169          |
| 33 | hsa-miR-1205      | 15            | 16            | 17            | 12           | 11           | 10           |
| 34 | hsa-miR-1207-3p   | 29            | 37            | 43            | 18           | 21           | 17           |
| 35 | hsa-miR-122-3p    | 33            | 41            | 37            | 18           | 19           | 12           |

|    |                   |      |      |      |      |      |      |
|----|-------------------|------|------|------|------|------|------|
| 36 | hsa-miR-1224-5p   | 23   | 28   | 25   | 19   | 17   | 17   |
| 37 | hsa-miR-1231      | 23   | 24   | 16   | 14   | 18   | 14   |
| 38 | hsa-miR-1234-3p   | 19   | 23   | 33   | 8    | 11   | 14   |
| 39 | hsa-miR-1238-3p   | 22   | 20   | 34   | 10   | 14   | 12   |
| 40 | hsa-miR-1238-5p   | 223  | 190  | 240  | 177  | 221  | 170  |
| 41 | hsa-miR-124-5p    | 49   | 64   | 47   | 33   | 41   | 39   |
| 42 | hsa-miR-1243      | 16   | 15   | 16   | 8    | 12   | 8    |
| 43 | hsa-miR-1244      | 110  | 125  | 87   | 75   | 74   | 49   |
| 44 | hsa-miR-1246      | 252  | 201  | 219  | 317  | 261  | 220  |
| 45 | hsa-miR-1247-3p   | 24   | 24   | 22   | 11   | 10   | 14   |
| 46 | hsa-miR-1247-5p   | 38   | 28   | 35   | 24   | 18   | 27   |
| 47 | hsa-miR-1253      | 20   | 19   | 22   | 11   | 10   | 15   |
| 48 | hsa-miR-1254      | 17   | 19   | 25   | 11   | 11   | 12   |
| 49 | hsa-miR-1255a     | 26   | 24   | 20   | 12   | 13   | 14   |
| 50 | hsa-miR-1256      | 234  | 330  | 267  | 154  | 265  | 238  |
| 51 | hsa-miR-1258      | 1166 | 1003 | 764  | 996  | 914  | 1088 |
| 52 | hsa-miR-125a-3p   | 21   | 19   | 19   | 12   | 13   | 11   |
| 53 | hsa-miR-125a-5p   | 254  | 311  | 258  | 115  | 142  | 160  |
| 54 | hsa-miR-125b-2-3p | 344  | 263  | 354  | 149  | 110  | 164  |
| 55 | hsa-miR-125b-5p   | 57   | 38   | 57   | 23   | 18   | 24   |
| 56 | hsa-miR-126-3p    | 99   | 103  | 149  | 60   | 49   | 101  |
| 57 | hsa-miR-126-5p    | 1341 | 1523 | 1954 | 950  | 684  | 1242 |
| 58 | hsa-miR-1260b     | 109  | 220  | 159  | 116  | 138  | 95   |
| 59 | hsa-miR-1261      | 3675 | 3309 | 2610 | 2811 | 2640 | 2576 |
| 60 | hsa-miR-1262      | 31   | 22   | 28   | 15   | 23   | 19   |
| 61 | hsa-miR-1266-5p   | 219  | 277  | 185  | 126  | 92   | 111  |
| 62 | hsa-miR-127-3p    | 20   | 28   | 54   | 12   | 22   | 18   |
| 63 | hsa-miR-1271-5p   | 98   | 65   | 40   | 31   | 30   | 41   |
| 64 | hsa-miR-1272      | 69   | 78   | 62   | 56   | 62   | 55   |
| 65 | hsa-miR-1273a     | 28   | 25   | 35   | 15   | 15   | 12   |
| 66 | hsa-miR-1273c     | 71   | 45   | 81   | 36   | 51   | 42   |
| 67 | hsa-miR-1273e     | 50   | 40   | 52   | 28   | 30   | 34   |
| 68 | hsa-miR-1273g-3p  | 44   | 57   | 56   | 25   | 29   | 33   |
| 69 | hsa-miR-1275      | 29   | 33   | 22   | 22   | 28   | 29   |
| 70 | hsa-miR-1276      | 19   | 25   | 23   | 13   | 12   | 15   |
| 71 | hsa-miR-1277-3p   | 482  | 478  | 405  | 331  | 222  | 201  |
| 72 | hsa-miR-1277-5p   | 39   | 51   | 41   | 24   | 21   | 22   |
| 73 | hsa-miR-128-1-5p  | 557  | 497  | 634  | 388  | 387  | 438  |
| 74 | hsa-miR-128-3p    | 1050 | 846  | 1029 | 473  | 381  | 492  |
| 75 | hsa-miR-1285-3p   | 202  | 182  | 159  | 88   | 88   | 100  |
| 76 | hsa-miR-1286      | 89   | 83   | 66   | 29   | 24   | 26   |

|     |                 |       |       |       |       |       |       |
|-----|-----------------|-------|-------|-------|-------|-------|-------|
| 77  | hsa-miR-1287-5p | 33    | 40    | 71    | 20    | 24    | 24    |
| 78  | hsa-miR-1288-3p | 17    | 24    | 24    | 14    | 15    | 18    |
| 79  | hsa-miR-1288-5p | 16    | 19    | 23    | 9     | 14    | 9     |
| 80  | hsa-miR-1290    | 20    | 28    | 19    | 17    | 16    | 14    |
| 81  | hsa-miR-1291    | 24    | 18    | 21    | 10    | 11    | 10    |
| 82  | hsa-miR-1292-5p | 16    | 17    | 15    | 9     | 8     | 10    |
| 83  | hsa-miR-1296-5p | 47    | 52    | 49    | 21    | 26    | 29    |
| 84  | hsa-miR-1298-5p | 25    | 21    | 26    | 16    | 14    | 12    |
| 85  | hsa-miR-1299    | 31    | 28    | 26    | 17    | 17    | 23    |
| 86  | hsa-miR-1301-3p | 58    | 37    | 39    | 18    | 17    | 24    |
| 87  | hsa-miR-1303    | 65    | 66    | 61    | 25    | 28    | 34    |
| 88  | hsa-miR-1304-3p | 115   | 82    | 107   | 50    | 44    | 46    |
| 89  | hsa-miR-1305    | 51    | 49    | 33    | 24    | 18    | 15    |
| 90  | hsa-miR-1306-3p | 47    | 40    | 47    | 27    | 30    | 27    |
| 91  | hsa-miR-1307-3p | 194   | 181   | 244   | 91    | 87    | 109   |
| 92  | hsa-miR-1307-5p | 1294  | 1334  | 945   | 729   | 429   | 294   |
| 93  | hsa-miR-130a-3p | 283   | 321   | 315   | 126   | 134   | 177   |
| 94  | hsa-miR-130b-3p | 1641  | 1221  | 978   | 675   | 562   | 460   |
| 95  | hsa-miR-130b-5p | 358   | 253   | 291   | 141   | 114   | 134   |
| 96  | hsa-miR-132-3p  | 52    | 38    | 56    | 23    | 25    | 37    |
| 97  | hsa-miR-132-5p  | 23    | 23    | 27    | 13    | 15    | 16    |
| 98  | hsa-miR-1322    | 39    | 35    | 35    | 23    | 24    | 23    |
| 99  | hsa-miR-133a-5p | 27    | 16    | 37    | 8     | 13    | 10    |
| 100 | hsa-miR-1343-5p | 28    | 24    | 30    | 21    | 21    | 19    |
| 101 | hsa-miR-135a-5p | 24    | 21    | 25    | 17    | 14    | 17    |
| 102 | hsa-miR-136-5p  | 82    | 59    | 58    | 54    | 57    | 49    |
| 103 | hsa-miR-137     | 69    | 82    | 83    | 61    | 62    | 61    |
| 104 | hsa-miR-138-5p  | 42    | 37    | 57    | 18    | 17    | 25    |
| 105 | hsa-miR-140-3p  | 294   | 357   | 306   | 106   | 135   | 123   |
| 106 | hsa-miR-140-5p  | 46    | 51    | 41    | 36    | 25    | 32    |
| 107 | hsa-miR-141-3p  | 45    | 42    | 35    | 24    | 26    | 17    |
| 108 | hsa-miR-143-3p  | 42    | 46    | 59    | 22    | 27    | 29    |
| 109 | hsa-miR-144-5p  | 21    | 32    | 20    | 16    | 19    | 9     |
| 110 | hsa-miR-145-3p  | 42    | 37    | 30    | 34    | 27    | 31    |
| 111 | hsa-miR-1468-3p | 3887  | 2823  | 3231  | 1649  | 2035  | 2775  |
| 112 | hsa-miR-146b-3p | 25    | 21    | 22    | 12    | 11    | 10    |
| 113 | hsa-miR-146b-5p | 619   | 615   | 542   | 247   | 256   | 450   |
| 114 | hsa-miR-148a-3p | 34598 | 36667 | 30715 | 16107 | 12690 | 12542 |
| 115 | hsa-miR-148a-5p | 328   | 280   | 309   | 116   | 105   | 100   |
| 116 | hsa-miR-148b-3p | 3408  | 2766  | 3023  | 1551  | 1133  | 1343  |
| 117 | hsa-miR-148b-5p | 236   | 220   | 214   | 93    | 75    | 76    |

|     |                   |       |       |       |       |       |       |
|-----|-------------------|-------|-------|-------|-------|-------|-------|
| 118 | hsa-miR-149-3p    | 20    | 19    | 22    | 14    | 14    | 15    |
| 119 | hsa-miR-149-5p    | 17    | 18    | 23    | 8     | 10    | 10    |
| 120 | hsa-miR-151a-3p   | 5094  | 3475  | 3989  | 1743  | 1490  | 1850  |
| 121 | hsa-miR-151a-5p   | 3106  | 2322  | 2394  | 1183  | 980   | 1224  |
| 122 | hsa-miR-152-3p    | 53    | 58    | 43    | 53    | 50    | 44    |
| 123 | hsa-miR-152-5p    | 66    | 45    | 63    | 35    | 28    | 55    |
| 124 | hsa-miR-153-3p    | 32    | 33    | 24    | 19    | 20    | 17    |
| 125 | hsa-miR-153-5p    | 641   | 461   | 581   | 336   | 350   | 537   |
| 126 | hsa-miR-1537-5p   | 16    | 23    | 28    | 10    | 15    | 10    |
| 127 | hsa-miR-1538      | 32    | 34    | 35    | 20    | 16    | 18    |
| 128 | hsa-miR-155-3p    | 53    | 82    | 101   | 29    | 58    | 38    |
| 129 | hsa-miR-15a-5p    | 571   | 412   | 553   | 317   | 198   | 257   |
| 130 | hsa-miR-15b-3p    | 22    | 23    | 31    | 13    | 11    | 12    |
| 131 | hsa-miR-15b-5p    | 200   | 170   | 218   | 64    | 66    | 97    |
| 132 | hsa-miR-16-2-3p   | 85    | 87    | 91    | 60    | 53    | 53    |
| 133 | hsa-miR-16-5p     | 14409 | 9703  | 14098 | 4976  | 3117  | 5616  |
| 134 | hsa-miR-17-3p     | 255   | 172   | 237   | 155   | 77    | 125   |
| 135 | hsa-miR-17-5p     | 1223  | 660   | 1427  | 572   | 311   | 700   |
| 136 | hsa-miR-181a-2-3p | 54    | 63    | 68    | 25    | 27    | 30    |
| 137 | hsa-miR-181a-3p   | 138   | 174   | 129   | 53    | 74    | 54    |
| 138 | hsa-miR-181a-5p   | 2067  | 2779  | 2120  | 952   | 1584  | 1125  |
| 139 | hsa-miR-181b-3p   | 36    | 52    | 34    | 23    | 24    | 16    |
| 140 | hsa-miR-181b-5p   | 953   | 923   | 996   | 310   | 387   | 358   |
| 141 | hsa-miR-181c-3p   | 279   | 315   | 295   | 169   | 143   | 130   |
| 142 | hsa-miR-181c-5p   | 694   | 755   | 733   | 468   | 514   | 469   |
| 143 | hsa-miR-181d-3p   | 19    | 16    | 36    | 13    | 15    | 14    |
| 144 | hsa-miR-181d-5p   | 313   | 347   | 328   | 181   | 166   | 168   |
| 145 | hsa-miR-182-5p    | 30381 | 23326 | 25161 | 11652 | 11007 | 12131 |
| 146 | hsa-miR-183-5p    | 7033  | 6248  | 5603  | 3920  | 3474  | 4101  |
| 147 | hsa-miR-184       | 29    | 30    | 29    | 19    | 22    | 20    |
| 148 | hsa-miR-185-3p    | 37    | 28    | 46    | 11    | 14    | 13    |
| 149 | hsa-miR-186-5p    | 10964 | 8712  | 9262  | 4575  | 3547  | 4479  |
| 150 | hsa-miR-187-3p    | 22    | 24    | 28    | 11    | 9     | 15    |
| 151 | hsa-miR-187-5p    | 24    | 27    | 25    | 17    | 13    | 17    |
| 152 | hsa-miR-18a-5p    | 408   | 273   | 461   | 223   | 103   | 219   |
| 153 | hsa-miR-1908-3p   | 64    | 77    | 77    | 60    | 57    | 53    |
| 154 | hsa-miR-1909-3p   | 1358  | 1143  | 2388  | 475   | 1012  | 938   |
| 155 | hsa-miR-191-3p    | 22    | 17    | 24    | 14    | 12    | 15    |
| 156 | hsa-miR-191-5p    | 6330  | 5313  | 5551  | 1946  | 2029  | 3295  |
| 157 | hsa-miR-1910-3p   | 632   | 615   | 443   | 489   | 476   | 337   |
| 158 | hsa-miR-1910-5p   | 19    | 19    | 27    | 8     | 6     | 9     |

|     |                                 |      |      |      |      |      |      |
|-----|---------------------------------|------|------|------|------|------|------|
| 159 | hsa-miR-1912                    | 29   | 21   | 35   | 16   | 17   | 15   |
| 160 | hsa-miR-1913                    | 76   | 86   | 66   | 58   | 59   | 45   |
| 161 | hsa-miR-1914-5p                 | 6522 | 7858 | 5251 | 4883 | 5092 | 4070 |
| 162 | hsa-miR-192-5p                  | 6659 | 6034 | 5366 | 2903 | 2199 | 2517 |
| 163 | hsa-miR-193b-3p                 | 34   | 48   | 43   | 17   | 23   | 16   |
| 164 | hsa-miR-194-5p                  | 111  | 101  | 111  | 56   | 43   | 53   |
| 165 | hsa-miR-195-5p                  | 37   | 31   | 35   | 10   | 12   | 13   |
| 166 | hsa-miR-196a-3p                 | 117  | 191  | 107  | 63   | 83   | 54   |
| 167 | hsa-miR-196a-5p                 | 2236 | 3284 | 1429 | 323  | 503  | 322  |
| 168 | hsa-miR-196b-5p                 | 3488 | 3214 | 2376 | 1810 | 1379 | 1302 |
| 169 | hsa-miR-197-5p                  | 31   | 50   | 38   | 28   | 33   | 30   |
| 170 | hsa-miR-1972                    | 18   | 21   | 21   | 8    | 11   | 11   |
| 171 | hsa-miR-199a-3p_hsa-miR-199b-3p | 41   | 25   | 39   | 13   | 15   | 17   |
| 172 | hsa-miR-199b-5p                 | 185  | 132  | 449  | 54   | 105  | 91   |
| 173 | hsa-miR-19a-3p                  | 1299 | 837  | 1167 | 864  | 375  | 623  |
| 174 | hsa-miR-19b-3p                  | 1472 | 952  | 1411 | 881  | 461  | 778  |
| 175 | hsa-miR-200b-3p                 | 377  | 218  | 312  | 157  | 177  | 159  |
| 176 | hsa-miR-200b-5p                 | 21   | 23   | 39   | 17   | 26   | 37   |
| 177 | hsa-miR-200c-3p                 | 118  | 81   | 121  | 87   | 67   | 85   |
| 178 | hsa-miR-203a                    | 52   | 37   | 58   | 33   | 33   | 35   |
| 179 | hsa-miR-203b-3p                 | 42   | 37   | 31   | 25   | 29   | 28   |
| 180 | hsa-miR-2053                    | 156  | 159  | 228  | 106  | 102  | 104  |
| 181 | hsa-miR-2054                    | 33   | 31   | 35   | 21   | 20   | 19   |
| 182 | hsa-miR-20a-5p                  | 891  | 495  | 1230 | 485  | 254  | 506  |
| 183 | hsa-miR-21-3p                   | 380  | 874  | 337  | 209  | 319  | 123  |
| 184 | hsa-miR-21-5p                   | 3593 | 7717 | 3331 | 1626 | 2444 | 1170 |
| 185 | hsa-miR-210-3p                  | 93   | 107  | 63   | 35   | 34   | 28   |
| 186 | hsa-miR-2113                    | 30   | 26   | 54   | 22   | 28   | 28   |
| 187 | hsa-miR-2115-3p                 | 96   | 106  | 83   | 64   | 80   | 75   |
| 188 | hsa-miR-2116-3p                 | 27   | 24   | 29   | 17   | 16   | 16   |
| 189 | hsa-miR-2117                    | 46   | 51   | 69   | 37   | 38   | 39   |
| 190 | hsa-miR-212-5p                  | 33   | 26   | 37   | 15   | 15   | 18   |
| 191 | hsa-miR-215-5p                  | 483  | 483  | 476  | 143  | 153  | 138  |
| 192 | hsa-miR-218-1-3p                | 28   | 35   | 26   | 14   | 18   | 22   |
| 193 | hsa-miR-218-5p                  | 904  | 1004 | 1046 | 350  | 285  | 373  |
| 194 | hsa-miR-219a-1-3p               | 20   | 17   | 16   | 11   | 11   | 8    |
| 195 | hsa-miR-22-3p                   | 5605 | 6804 | 5512 | 695  | 933  | 897  |
| 196 | hsa-miR-221-3p                  | 974  | 237  | 482  | 1476 | 284  | 688  |
| 197 | hsa-miR-221-5p                  | 637  | 119  | 245  | 220  | 45   | 151  |
| 198 | hsa-miR-222-3p                  | 4025 | 1270 | 3014 | 1709 | 501  | 1179 |

|     |                  |       |       |       |      |      |      |
|-----|------------------|-------|-------|-------|------|------|------|
| 199 | hsa-miR-222-5p   | 285   | 67    | 182   | 127  | 25   | 78   |
| 200 | hsa-miR-223-3p   | 38    | 42    | 52    | 19   | 29   | 23   |
| 201 | hsa-miR-224-5p   | 31    | 28    | 32    | 22   | 21   | 23   |
| 202 | hsa-miR-2277-5p  | 67    | 77    | 70    | 32   | 27   | 28   |
| 203 | hsa-miR-2355-3p  | 25    | 22    | 22    | 15   | 12   | 14   |
| 204 | hsa-miR-2392     | 68    | 64    | 86    | 47   | 45   | 41   |
| 205 | hsa-miR-23a-3p   | 31    | 31    | 27    | 11   | 16   | 19   |
| 206 | hsa-miR-23b-3p   | 83    | 60    | 67    | 28   | 32   | 50   |
| 207 | hsa-miR-23c      | 46    | 35    | 47    | 49   | 45   | 55   |
| 208 | hsa-miR-24-2-5p  | 17    | 21    | 22    | 10   | 12   | 11   |
| 209 | hsa-miR-24-3p    | 79    | 98    | 75    | 45   | 52   | 71   |
| 210 | hsa-miR-2467-5p  | 65    | 59    | 44    | 30   | 18   | 19   |
| 211 | hsa-miR-25-3p    | 17258 | 14189 | 15949 | 5015 | 4777 | 5610 |
| 212 | hsa-miR-25-5p    | 117   | 101   | 110   | 46   | 44   | 57   |
| 213 | hsa-miR-2681-3p  | 37    | 44    | 34    | 25   | 20   | 26   |
| 214 | hsa-miR-26a-2-3p | 27    | 22    | 27    | 19   | 17   | 14   |
| 215 | hsa-miR-26a-5p   | 11583 | 11443 | 10906 | 5206 | 4599 | 5025 |
| 216 | hsa-miR-26b-3p   | 47    | 34    | 51    | 28   | 18   | 32   |
| 217 | hsa-miR-26b-5p   | 1622  | 1452  | 2133  | 1449 | 894  | 1951 |
| 218 | hsa-miR-27a-3p   | 195   | 224   | 153   | 98   | 81   | 77   |
| 219 | hsa-miR-27a-5p   | 25    | 34    | 30    | 18   | 25   | 17   |
| 220 | hsa-miR-27b-3p   | 9697  | 9436  | 9203  | 2923 | 2441 | 2556 |
| 221 | hsa-miR-27b-5p   | 121   | 102   | 88    | 53   | 52   | 48   |
| 222 | hsa-miR-28-3p    | 1637  | 1547  | 1856  | 511  | 499  | 623  |
| 223 | hsa-miR-28-5p    | 196   | 228   | 212   | 79   | 78   | 91   |
| 224 | hsa-miR-2861     | 28    | 24    | 30    | 19   | 14   | 21   |
| 225 | hsa-miR-296-3p   | 88    | 84    | 72    | 41   | 35   | 55   |
| 226 | hsa-miR-298      | 114   | 137   | 181   | 100  | 99   | 157  |
| 227 | hsa-miR-29a-3p   | 142   | 171   | 118   | 83   | 74   | 51   |
| 228 | hsa-miR-29b-2-5p | 24    | 17    | 23    | 14   | 15   | 23   |
| 229 | hsa-miR-29b-3p   | 18    | 25    | 20    | 10   | 9    | 7    |
| 230 | hsa-miR-29c-3p   | 133   | 172   | 143   | 68   | 69   | 60   |
| 231 | hsa-miR-301a-3p  | 1073  | 1173  | 1068  | 756  | 699  | 597  |
| 232 | hsa-miR-301a-5p  | 18    | 23    | 17    | 9    | 9    | 10   |
| 233 | hsa-miR-301b     | 841   | 1033  | 541   | 606  | 634  | 314  |
| 234 | hsa-miR-3065-5p  | 21    | 18    | 22    | 12   | 14   | 12   |
| 235 | hsa-miR-3074-3p  | 24    | 22    | 15    | 12   | 11   | 11   |
| 236 | hsa-miR-3074-5p  | 20    | 18    | 17    | 10   | 9    | 12   |
| 237 | hsa-miR-30a-3p   | 236   | 260   | 251   | 258  | 261  | 283  |
| 238 | hsa-miR-30a-5p   | 8667  | 11179 | 9448  | 3980 | 3875 | 3496 |
| 239 | hsa-miR-30b-5p   | 232   | 236   | 254   | 110  | 102  | 100  |

|     |                  |       |       |       |      |      |      |
|-----|------------------|-------|-------|-------|------|------|------|
| 240 | hsa-miR-30c-1-3p | 173   | 146   | 158   | 86   | 70   | 87   |
| 241 | hsa-miR-30c-2-3p | 50    | 37    | 42    | 19   | 21   | 23   |
| 242 | hsa-miR-30c-5p   | 1047  | 1061  | 1463  | 436  | 401  | 506  |
| 243 | hsa-miR-30d-3p   | 202   | 235   | 174   | 148  | 142  | 119  |
| 244 | hsa-miR-30d-5p   | 2996  | 3451  | 3581  | 1375 | 1466 | 1684 |
| 245 | hsa-miR-30e-3p   | 750   | 605   | 647   | 652  | 551  | 634  |
| 246 | hsa-miR-30e-5p   | 13653 | 15078 | 13925 | 6206 | 4595 | 4892 |
| 247 | hsa-miR-31-5p    | 455   | 504   | 514   | 171  | 164  | 186  |
| 248 | hsa-miR-3121-3p  | 17    | 17    | 187   | 9    | 11   | 14   |
| 249 | hsa-miR-3122     | 93    | 67    | 66    | 37   | 35   | 39   |
| 250 | hsa-miR-3125     | 17    | 18    | 15    | 9    | 11   | 9    |
| 251 | hsa-miR-3126-5p  | 21    | 18    | 21    | 11   | 16   | 14   |
| 252 | hsa-miR-3128     | 24    | 17    | 27    | 9    | 14   | 9    |
| 253 | hsa-miR-3129-5p  | 46    | 31    | 39    | 21   | 14   | 12   |
| 254 | hsa-miR-3130-3p  | 16    | 17    | 20    | 10   | 10   | 10   |
| 255 | hsa-miR-3135a    | 29    | 23    | 24    | 14   | 13   | 21   |
| 256 | hsa-miR-3135b    | 28    | 16    | 39    | 8    | 9    | 11   |
| 257 | hsa-miR-3137     | 38    | 34    | 33    | 27   | 27   | 26   |
| 258 | hsa-miR-3138     | 19    | 21    | 17    | 11   | 12   | 15   |
| 259 | hsa-miR-3142     | 23    | 21    | 50    | 7    | 12   | 15   |
| 260 | hsa-miR-3143     | 27    | 27    | 30    | 20   | 14   | 13   |
| 261 | hsa-miR-3144-3p  | 238   | 223   | 181   | 176  | 164  | 132  |
| 262 | hsa-miR-3144-5p  | 46    | 37    | 50    | 23   | 22   | 21   |
| 263 | hsa-miR-3147     | 59    | 49    | 61    | 26   | 28   | 30   |
| 264 | hsa-miR-3150a-5p | 28    | 29    | 38    | 18   | 17   | 17   |
| 265 | hsa-miR-3150b-3p | 21    | 24    | 19    | 16   | 17   | 19   |
| 266 | hsa-miR-3158-3p  | 47    | 38    | 40    | 23   | 24   | 20   |
| 267 | hsa-miR-3160-3p  | 27    | 20    | 22    | 13   | 13   | 17   |
| 268 | hsa-miR-3161     | 28    | 27    | 28    | 19   | 22   | 19   |
| 269 | hsa-miR-3164     | 25    | 24    | 28    | 17   | 16   | 21   |
| 270 | hsa-miR-3168     | 168   | 191   | 510   | 158  | 116  | 211  |
| 271 | hsa-miR-3170     | 17    | 16    | 27    | 9    | 11   | 14   |
| 272 | hsa-miR-3171     | 20    | 18    | 25    | 11   | 10   | 10   |
| 273 | hsa-miR-3173-5p  | 52    | 43    | 49    | 28   | 23   | 28   |
| 274 | hsa-miR-3174     | 28    | 26    | 24    | 13   | 14   | 15   |
| 275 | hsa-miR-3175     | 117   | 85    | 112   | 61   | 60   | 79   |
| 276 | hsa-miR-3176     | 206   | 280   | 161   | 83   | 85   | 60   |
| 277 | hsa-miR-3178     | 19    | 20    | 20    | 12   | 15   | 14   |
| 278 | hsa-miR-3180-5p  | 25    | 31    | 44    | 17   | 18   | 21   |
| 279 | hsa-miR-3181     | 572   | 425   | 774   | 360  | 301  | 579  |
| 280 | hsa-miR-3182     | 1519  | 1503  | 1353  | 1209 | 1158 | 1105 |

|     |                 |      |      |      |     |     |     |
|-----|-----------------|------|------|------|-----|-----|-----|
| 281 | hsa-miR-3183    | 37   | 33   | 38   | 28  | 22  | 27  |
| 282 | hsa-miR-3184-5p | 20   | 24   | 28   | 13  | 15  | 15  |
| 283 | hsa-miR-3186-3p | 17   | 17   | 32   | 10  | 13  | 14  |
| 284 | hsa-miR-3189-3p | 19   | 29   | 21   | 11  | 13  | 19  |
| 285 | hsa-miR-3195    | 203  | 211  | 200  | 190 | 199 | 144 |
| 286 | hsa-miR-3197    | 21   | 15   | 25   | 12  | 7   | 14  |
| 287 | hsa-miR-32-3p   | 36   | 30   | 32   | 28  | 16  | 25  |
| 288 | hsa-miR-32-5p   | 75   | 95   | 73   | 62  | 61  | 42  |
| 289 | hsa-miR-3200-3p | 15   | 16   | 17   | 9   | 11  | 9   |
| 290 | hsa-miR-3200-5p | 23   | 19   | 19   | 16  | 15  | 14  |
| 291 | hsa-miR-3201    | 19   | 18   | 21   | 14  | 13  | 14  |
| 292 | hsa-miR-3202    | 16   | 18   | 25   | 10  | 11  | 12  |
| 293 | hsa-miR-320a    | 132  | 155  | 181  | 56  | 58  | 65  |
| 294 | hsa-miR-324-3p  | 37   | 39   | 35   | 18  | 17  | 19  |
| 295 | hsa-miR-324-5p  | 18   | 20   | 19   | 9   | 8   | 9   |
| 296 | hsa-miR-329-5p  | 25   | 23   | 27   | 15  | 11  | 11  |
| 297 | hsa-miR-330-3p  | 25   | 23   | 28   | 7   | 7   | 11  |
| 298 | hsa-miR-330-5p  | 194  | 203  | 151  | 98  | 67  | 53  |
| 299 | hsa-miR-331-3p  | 38   | 38   | 45   | 19  | 15  | 19  |
| 300 | hsa-miR-331-5p  | 39   | 43   | 42   | 24  | 17  | 20  |
| 301 | hsa-miR-335-3p  | 56   | 33   | 203  | 11  | 18  | 14  |
| 302 | hsa-miR-337-3p  | 91   | 70   | 45   | 60  | 52  | 52  |
| 303 | hsa-miR-338-3p  | 29   | 37   | 33   | 20  | 30  | 19  |
| 304 | hsa-miR-338-5p  | 19   | 16   | 17   | 11  | 14  | 13  |
| 305 | hsa-miR-339-3p  | 201  | 176  | 179  | 113 | 102 | 100 |
| 306 | hsa-miR-339-5p  | 49   | 47   | 43   | 27  | 24  | 18  |
| 307 | hsa-miR-33a-5p  | 63   | 56   | 75   | 30  | 19  | 18  |
| 308 | hsa-miR-33b-3p  | 23   | 16   | 21   | 14  | 15  | 16  |
| 309 | hsa-miR-33b-5p  | 19   | 27   | 17   | 13  | 9   | 7   |
| 310 | hsa-miR-340-3p  | 111  | 84   | 104  | 51  | 38  | 48  |
| 311 | hsa-miR-340-5p  | 1577 | 1494 | 1341 | 784 | 592 | 512 |
| 312 | hsa-miR-342-3p  | 85   | 68   | 71   | 34  | 31  | 46  |
| 313 | hsa-miR-345-3p  | 202  | 258  | 444  | 187 | 246 | 171 |
| 314 | hsa-miR-345-5p  | 378  | 435  | 443  | 176 | 169 | 222 |
| 315 | hsa-miR-34c-5p  | 37   | 43   | 44   | 21  | 19  | 18  |
| 316 | hsa-miR-3529-3p | 24   | 26   | 25   | 15  | 16  | 17  |
| 317 | hsa-miR-3591-3p | 16   | 35   | 20   | 11  | 13  | 10  |
| 318 | hsa-miR-3605-5p | 79   | 63   | 85   | 44  | 53  | 54  |
| 319 | hsa-miR-3606-3p | 719  | 845  | 617  | 408 | 582 | 414 |
| 320 | hsa-miR-3607-5p | 80   | 62   | 59   | 55  | 70  | 56  |
| 321 | hsa-miR-3609    | 59   | 53   | 49   | 57  | 55  | 45  |



|     |                                  |      |      |      |      |      |      |
|-----|----------------------------------|------|------|------|------|------|------|
| 322 | hsa-miR-361-5p                   | 2611 | 1707 | 2309 | 1328 | 862  | 1100 |
| 323 | hsa-miR-3611                     | 96   | 76   | 110  | 59   | 69   | 70   |
| 324 | hsa-miR-3613-3p                  | 497  | 294  | 547  | 264  | 188  | 367  |
| 325 | hsa-miR-3613-5p                  | 83   | 57   | 61   | 57   | 37   | 57   |
| 326 | hsa-miR-3614-3p                  | 26   | 27   | 40   | 24   | 26   | 19   |
| 327 | hsa-miR-3614-5p                  | 1520 | 1453 | 894  | 1254 | 1016 | 774  |
| 328 | hsa-miR-3615                     | 95   | 69   | 108  | 49   | 45   | 57   |
| 329 | hsa-miR-3617-3p                  | 19   | 22   | 17   | 21   | 15   | 16   |
| 330 | hsa-miR-3621                     | 73   | 54   | 168  | 31   | 32   | 32   |
| 331 | hsa-miR-3622b-3p                 | 86   | 85   | 120  | 69   | 75   | 101  |
| 332 | hsa-miR-363-3p                   | 126  | 224  | 104  | 68   | 105  | 67   |
| 333 | hsa-miR-363-5p                   | 26   | 23   | 26   | 23   | 20   | 20   |
| 334 | hsa-miR-3646                     | 30   | 19   | 25   | 15   | 23   | 21   |
| 335 | hsa-miR-3649                     | 34   | 26   | 27   | 18   | 16   | 23   |
| 336 | hsa-miR-3650                     | 24   | 22   | 31   | 15   | 18   | 15   |
| 337 | hsa-miR-3651                     | 68   | 69   | 58   | 59   | 46   | 41   |
| 338 | hsa-miR-3652                     | 68   | 59   | 69   | 38   | 55   | 67   |
| 339 | hsa-miR-3653                     | 20   | 18   | 19   | 11   | 9    | 11   |
| 340 | hsa-miR-365a-3p__hsa-miR-365b-3p | 26   | 30   | 100  | 11   | 15   | 17   |
| 341 | hsa-miR-3660                     | 141  | 145  | 117  | 91   | 87   | 52   |
| 342 | hsa-miR-3661                     | 26   | 16   | 27   | 10   | 10   | 15   |
| 343 | hsa-miR-3662                     | 2618 | 2748 | 1650 | 1928 | 2167 | 1491 |
| 344 | hsa-miR-3671                     | 53   | 57   | 72   | 38   | 28   | 48   |
| 345 | hsa-miR-3672                     | 556  | 592  | 463  | 458  | 416  | 304  |
| 346 | hsa-miR-3673                     | 20   | 22   | 18   | 15   | 9    | 10   |
| 347 | hsa-miR-3675-3p                  | 25   | 23   | 30   | 15   | 15   | 18   |
| 348 | hsa-miR-3677-3p                  | 52   | 62   | 36   | 24   | 20   | 22   |
| 349 | hsa-miR-3680-3p                  | 19   | 18   | 27   | 16   | 19   | 20   |
| 350 | hsa-miR-3680-5p                  | 16   | 16   | 17   | 11   | 10   | 11   |
| 351 | hsa-miR-3681-5p                  | 26   | 31   | 19   | 23   | 35   | 26   |
| 352 | hsa-miR-3682-3p                  | 312  | 393  | 265  | 236  | 349  | 208  |
| 353 | hsa-miR-3687                     | 39   | 34   | 49   | 25   | 26   | 28   |
| 354 | hsa-miR-3688-3p                  | 16   | 23   | 21   | 8    | 10   | 10   |
| 355 | hsa-miR-3688-5p                  | 930  | 811  | 834  | 616  | 572  | 535  |
| 356 | hsa-miR-3690                     | 55   | 53   | 62   | 29   | 35   | 38   |
| 357 | hsa-miR-3692-5p                  | 16   | 21   | 17   | 7    | 11   | 13   |
| 358 | hsa-miR-370-3p                   | 1364 | 1376 | 1205 | 650  | 690  | 688  |
| 359 | hsa-miR-370-5p                   | 46   | 58   | 61   | 24   | 28   | 18   |
| 360 | hsa-miR-371b-5p                  | 40   | 34   | 46   | 33   | 23   | 31   |
| 361 | hsa-miR-372-3p                   | 49   | 43   | 46   | 31   | 32   | 42   |

|     |                   |       |       |       |       |       |      |
|-----|-------------------|-------|-------|-------|-------|-------|------|
| 362 | hsa-miR-373-5p    | 39    | 58    | 68    | 32    | 41    | 36   |
| 363 | hsa-miR-374a-3p   | 519   | 608   | 451   | 291   | 225   | 175  |
| 364 | hsa-miR-374a-5p   | 301   | 344   | 259   | 157   | 135   | 139  |
| 365 | hsa-miR-374b-3p   | 64    | 66    | 52    | 34    | 24    | 28   |
| 366 | hsa-miR-374b-5p   | 129   | 126   | 120   | 58    | 61    | 65   |
| 367 | hsa-miR-375       | 219   | 273   | 348   | 79    | 102   | 146  |
| 368 | hsa-miR-376a-2-5p | 66    | 79    | 66    | 40    | 35    | 37   |
| 369 | hsa-miR-378a-3p   | 6756  | 4965  | 6945  | 2493  | 2197  | 2958 |
| 370 | hsa-miR-378a-5p   | 21    | 19    | 28    | 11    | 13    | 11   |
| 371 | hsa-miR-380-3p    | 71    | 111   | 71    | 37    | 41    | 31   |
| 372 | hsa-miR-381-5p    | 29    | 18    | 24    | 14    | 17    | 14   |
| 373 | hsa-miR-383-3p    | 17    | 20    | 15    | 10    | 12    | 9    |
| 374 | hsa-miR-383-5p    | 25    | 19    | 15    | 11    | 11    | 9    |
| 375 | hsa-miR-3908      | 68    | 58    | 197   | 32    | 40    | 43   |
| 376 | hsa-miR-3913-5p   | 21    | 20    | 33    | 15    | 15    | 13   |
| 377 | hsa-miR-3914      | 24    | 28    | 28    | 15    | 21    | 15   |
| 378 | hsa-miR-3915      | 24    | 18    | 27    | 15    | 17    | 14   |
| 379 | hsa-miR-3916      | 24    | 22    | 21    | 12    | 16    | 13   |
| 380 | hsa-miR-3919      | 17    | 17    | 47    | 11    | 10    | 13   |
| 381 | hsa-miR-3920      | 78    | 58    | 46    | 59    | 56    | 45   |
| 382 | hsa-miR-3922-5p   | 310   | 307   | 252   | 168   | 185   | 137  |
| 383 | hsa-miR-3925-5p   | 22    | 19    | 22    | 11    | 14    | 15   |
| 384 | hsa-miR-3928-3p   | 35    | 29    | 28    | 16    | 17    | 20   |
| 385 | hsa-miR-3928-5p   | 27    | 29    | 33    | 21    | 23    | 30   |
| 386 | hsa-miR-3929      | 24    | 25    | 27    | 15    | 16    | 14   |
| 387 | hsa-miR-3934-5p   | 120   | 100   | 115   | 97    | 95    | 76   |
| 388 | hsa-miR-3937      | 463   | 603   | 364   | 427   | 323   | 198  |
| 389 | hsa-miR-3938      | 28    | 28    | 24    | 16    | 15    | 12   |
| 390 | hsa-miR-3939      | 25    | 16    | 22    | 9     | 9     | 11   |
| 391 | hsa-miR-3940-3p   | 38    | 46    | 46    | 23    | 22    | 18   |
| 392 | hsa-miR-3941      | 39    | 24    | 33    | 17    | 21    | 26   |
| 393 | hsa-miR-3943      | 13670 | 16003 | 13701 | 14858 | 12258 | 9652 |
| 394 | hsa-miR-3944-3p   | 32    | 32    | 32    | 28    | 24    | 26   |
| 395 | hsa-miR-3945      | 38    | 44    | 55    | 22    | 25    | 32   |
| 396 | hsa-miR-3960      | 168   | 139   | 169   | 165   | 110   | 113  |
| 397 | hsa-miR-410-5p    | 964   | 1140  | 1046  | 771   | 913   | 683  |
| 398 | hsa-miR-421       | 1456  | 1171  | 1391  | 626   | 462   | 628  |
| 399 | hsa-miR-423-3p    | 2087  | 1814  | 2907  | 810   | 753   | 1315 |
| 400 | hsa-miR-423-5p    | 1577  | 1292  | 1578  | 567   | 466   | 593  |
| 401 | hsa-miR-424-3p    | 41    | 34    | 36    | 19    | 19    | 25   |
| 402 | hsa-miR-424-5p    | 78    | 82    | 69    | 47    | 38    | 30   |

|     |                 |      |      |       |      |      |      |
|-----|-----------------|------|------|-------|------|------|------|
| 403 | hsa-miR-425-5p  | 184  | 208  | 191   | 81   | 85   | 99   |
| 404 | hsa-miR-4256    | 40   | 40   | 30    | 30   | 35   | 29   |
| 405 | hsa-miR-4267    | 543  | 467  | 409   | 234  | 247  | 197  |
| 406 | hsa-miR-4273    | 56   | 39   | 63    | 28   | 32   | 20   |
| 407 | hsa-miR-4280    | 23   | 20   | 32    | 13   | 18   | 18   |
| 408 | hsa-miR-4281    | 124  | 119  | 76    | 83   | 85   | 73   |
| 409 | hsa-miR-4284    | 270  | 174  | 279   | 163  | 128  | 176  |
| 410 | hsa-miR-4286    | 19   | 21   | 16    | 12   | 16   | 13   |
| 411 | hsa-miR-4291    | 32   | 60   | 43    | 19   | 50   | 26   |
| 412 | hsa-miR-4298    | 34   | 30   | 35    | 25   | 22   | 24   |
| 413 | hsa-miR-4309    | 32   | 18   | 82    | 18   | 15   | 21   |
| 414 | hsa-miR-4310    | 51   | 108  | 83    | 41   | 60   | 64   |
| 415 | hsa-miR-4313    | 24   | 33   | 27    | 16   | 18   | 16   |
| 416 | hsa-miR-4315    | 155  | 53   | 672   | 29   | 52   | 43   |
| 417 | hsa-miR-4321    | 500  | 714  | 2172  | 536  | 1042 | 594  |
| 418 | hsa-miR-4325    | 28   | 24   | 26    | 16   | 20   | 15   |
| 419 | hsa-miR-4330    | 188  | 168  | 12932 | 85   | 172  | 110  |
| 420 | hsa-miR-4417    | 26   | 21   | 27    | 17   | 19   | 23   |
| 421 | hsa-miR-4420    | 45   | 36   | 47    | 30   | 33   | 35   |
| 422 | hsa-miR-4423-5p | 27   | 19   | 35    | 36   | 14   | 25   |
| 423 | hsa-miR-4427    | 27   | 21   | 39    | 13   | 13   | 16   |
| 424 | hsa-miR-4429    | 306  | 356  | 315   | 239  | 259  | 176  |
| 425 | hsa-miR-4430    | 24   | 26   | 25    | 14   | 15   | 20   |
| 426 | hsa-miR-4431    | 649  | 570  | 554   | 399  | 406  | 375  |
| 427 | hsa-miR-4433-5p | 72   | 166  | 138   | 62   | 168  | 61   |
| 428 | hsa-miR-4443    | 4367 | 3261 | 2520  | 3333 | 1930 | 2096 |
| 429 | hsa-miR-4444    | 18   | 25   | 25    | 13   | 26   | 21   |
| 430 | hsa-miR-4448    | 1038 | 929  | 733   | 615  | 687  | 459  |
| 431 | hsa-miR-4449    | 41   | 53   | 77    | 24   | 26   | 25   |
| 432 | hsa-miR-4450    | 22   | 21   | 17    | 11   | 12   | 14   |
| 433 | hsa-miR-4451    | 149  | 196  | 108   | 108  | 126  | 68   |
| 434 | hsa-miR-4453    | 52   | 52   | 60    | 34   | 36   | 32   |
| 435 | hsa-miR-4454    | 4141 | 3425 | 7268  | 2628 | 2567 | 2935 |
| 436 | hsa-miR-4457    | 149  | 114  | 195   | 83   | 86   | 126  |
| 437 | hsa-miR-4459    | 34   | 30   | 81    | 20   | 21   | 28   |
| 438 | hsa-miR-4460    | 940  | 951  | 1041  | 606  | 624  | 540  |
| 439 | hsa-miR-4461    | 39   | 46   | 46    | 20   | 26   | 23   |
| 440 | hsa-miR-4465    | 52   | 87   | 75    | 35   | 60   | 45   |
| 441 | hsa-miR-4466    | 33   | 35   | 41    | 28   | 24   | 26   |
| 442 | hsa-miR-4467    | 27   | 28   | 36    | 22   | 21   | 23   |
| 443 | hsa-miR-4468    | 663  | 499  | 547   | 312  | 370  | 508  |

|     |                                    |      |      |      |      |      |      |
|-----|------------------------------------|------|------|------|------|------|------|
| 444 | hsa-miR-4473                       | 52   | 39   | 39   | 33   | 29   | 30   |
| 445 | hsa-miR-4475                       | 26   | 22   | 28   | 18   | 19   | 32   |
| 446 | hsa-miR-4479                       | 24   | 35   | 37   | 16   | 19   | 20   |
| 447 | hsa-miR-4482-5p                    | 31   | 29   | 35   | 18   | 22   | 26   |
| 448 | hsa-miR-4483                       | 581  | 846  | 904  | 646  | 846  | 648  |
| 449 | hsa-miR-4484                       | 86   | 81   | 110  | 45   | 56   | 67   |
| 450 | hsa-miR-4485                       | 28   | 23   | 20   | 18   | 22   | 20   |
| 451 | hsa-miR-4488                       | 23   | 26   | 26   | 20   | 22   | 22   |
| 452 | hsa-miR-4490                       | 19   | 30   | 20   | 14   | 10   | 10   |
| 453 | hsa-miR-4492                       | 52   | 33   | 41   | 76   | 39   | 52   |
| 454 | hsa-miR-4494                       | 20   | 20   | 17   | 10   | 10   | 11   |
| 455 | hsa-miR-4496                       | 19   | 17   | 21   | 11   | 10   | 12   |
| 456 | hsa-miR-4497                       | 35   | 28   | 24   | 25   | 24   | 19   |
| 457 | hsa-miR-449a                       | 37   | 31   | 22   | 17   | 14   | 8    |
| 458 | hsa-miR-449c-5p                    | 99   | 71   | 46   | 32   | 24   | 15   |
| 459 | hsa-miR-4502                       | 2641 | 1907 | 1822 | 1973 | 2158 | 2008 |
| 460 | hsa-miR-4504                       | 19   | 18   | 16   | 11   | 18   | 12   |
| 461 | hsa-miR-450a-5p                    | 37   | 53   | 28   | 26   | 27   | 16   |
| 462 | hsa-miR-450b-5p                    | 260  | 322  | 188  | 153  | 146  | 94   |
| 463 | hsa-miR-4515                       | 81   | 68   | 67   | 77   | 53   | 56   |
| 464 | hsa-miR-4517                       | 474  | 553  | 431  | 401  | 490  | 377  |
| 465 | hsa-miR-4518                       | 23   | 27   | 34   | 12   | 22   | 19   |
| 466 | hsa-miR-4520a-5p__hsa-miR-4520b-5p | 32   | 26   | 269  | 20   | 27   | 31   |
| 467 | hsa-miR-4521                       | 49   | 45   | 60   | 50   | 37   | 43   |
| 468 | hsa-miR-4527                       | 34   | 25   | 32   | 18   | 24   | 20   |
| 469 | hsa-miR-4530                       | 33   | 24   | 94   | 17   | 17   | 21   |
| 470 | hsa-miR-4532                       | 36   | 37   | 43   | 25   | 24   | 24   |
| 471 | hsa-miR-4535                       | 724  | 454  | 515  | 443  | 433  | 462  |
| 472 | hsa-miR-4537                       | 19   | 16   | 18   | 10   | 11   | 10   |
| 473 | hsa-miR-454-3p                     | 253  | 245  | 263  | 166  | 119  | 136  |
| 474 | hsa-miR-454-5p                     | 113  | 78   | 99   | 40   | 34   | 46   |
| 475 | hsa-miR-455-5p                     | 46   | 39   | 41   | 24   | 17   | 18   |
| 476 | hsa-miR-4634                       | 64   | 110  | 83   | 66   | 82   | 67   |
| 477 | hsa-miR-4635                       | 16   | 18   | 20   | 12   | 12   | 14   |
| 478 | hsa-miR-4638-3p                    | 36   | 95   | 68   | 23   | 53   | 24   |
| 479 | hsa-miR-4639-5p                    | 17   | 16   | 22   | 11   | 11   | 12   |
| 480 | hsa-miR-4642                       | 19   | 26   | 33   | 16   | 18   | 19   |
| 481 | hsa-miR-4644                       | 24   | 20   | 22   | 13   | 11   | 16   |
| 482 | hsa-miR-4648                       | 69   | 166  | 123  | 44   | 152  | 72   |
| 483 | hsa-miR-4650-3p                    | 38   | 41   | 52   | 30   | 35   | 34   |

|     |                 |      |      |      |      |      |      |
|-----|-----------------|------|------|------|------|------|------|
| 484 | hsa-miR-4653-5p | 227  | 374  | 304  | 172  | 292  | 196  |
| 485 | hsa-miR-4655-3p | 17   | 18   | 16   | 12   | 9    | 9    |
| 486 | hsa-miR-4660    | 20   | 24   | 27   | 11   | 10   | 14   |
| 487 | hsa-miR-4661-5p | 30   | 22   | 29   | 12   | 15   | 15   |
| 488 | hsa-miR-4662b   | 108  | 41   | 102  | 24   | 28   | 28   |
| 489 | hsa-miR-4664-3p | 20   | 18   | 26   | 10   | 12   | 12   |
| 490 | hsa-miR-4665-3p | 64   | 49   | 113  | 47   | 38   | 36   |
| 491 | hsa-miR-4668-3p | 15   | 15   | 16   | 9    | 9    | 8    |
| 492 | hsa-miR-4668-5p | 466  | 322  | 450  | 181  | 189  | 277  |
| 493 | hsa-miR-4670-5p | 56   | 50   | 44   | 40   | 48   | 38   |
| 494 | hsa-miR-4673    | 46   | 38   | 60   | 24   | 21   | 32   |
| 495 | hsa-miR-4676-3p | 116  | 88   | 129  | 70   | 74   | 86   |
| 496 | hsa-miR-4676-5p | 19   | 27   | 20   | 13   | 17   | 12   |
| 497 | hsa-miR-4677-3p | 126  | 143  | 114  | 55   | 59   | 53   |
| 498 | hsa-miR-4677-5p | 74   | 62   | 85   | 52   | 50   | 94   |
| 499 | hsa-miR-4680-5p | 17   | 25   | 27   | 10   | 13   | 9    |
| 500 | hsa-miR-4682    | 46   | 31   | 63   | 23   | 19   | 20   |
| 501 | hsa-miR-4683    | 39   | 42   | 158  | 26   | 32   | 35   |
| 502 | hsa-miR-4686    | 16   | 15   | 22   | 11   | 9    | 10   |
| 503 | hsa-miR-4688    | 19   | 15   | 27   | 9    | 10   | 10   |
| 504 | hsa-miR-4693-3p | 40   | 56   | 63   | 32   | 28   | 32   |
| 505 | hsa-miR-4695-3p | 1266 | 3942 | 2566 | 1642 | 2202 | 1281 |
| 506 | hsa-miR-4696    | 43   | 50   | 65   | 29   | 50   | 35   |
| 507 | hsa-miR-4699-3p | 137  | 154  | 109  | 121  | 119  | 83   |
| 508 | hsa-miR-4699-5p | 255  | 287  | 189  | 178  | 212  | 134  |
| 509 | hsa-miR-4700-5p | 98   | 72   | 140  | 36   | 46   | 36   |
| 510 | hsa-miR-4701-3p | 87   | 71   | 61   | 48   | 59   | 43   |
| 511 | hsa-miR-4701-5p | 22   | 42   | 31   | 22   | 26   | 31   |
| 512 | hsa-miR-4707-3p | 25   | 19   | 17   | 14   | 14   | 16   |
| 513 | hsa-miR-4707-5p | 15   | 18   | 18   | 15   | 11   | 18   |
| 514 | hsa-miR-4708-3p | 48   | 40   | 82   | 35   | 30   | 32   |
| 515 | hsa-miR-4709-3p | 21   | 18   | 23   | 9    | 13   | 15   |
| 516 | hsa-miR-4711-3p | 27   | 23   | 20   | 19   | 19   | 19   |
| 517 | hsa-miR-4711-5p | 20   | 22   | 19   | 13   | 17   | 18   |
| 518 | hsa-miR-4712-3p | 18   | 16   | 20   | 10   | 10   | 10   |
| 519 | hsa-miR-4715-5p | 19   | 15   | 33   | 11   | 12   | 13   |
| 520 | hsa-miR-4717-3p | 27   | 18   | 24   | 15   | 19   | 24   |
| 521 | hsa-miR-4718    | 32   | 23   | 27   | 20   | 20   | 21   |
| 522 | hsa-miR-4722-3p | 59   | 71   | 71   | 60   | 58   | 47   |
| 523 | hsa-miR-4722-5p | 24   | 17   | 29   | 14   | 13   | 23   |
| 524 | hsa-miR-4726-5p | 48   | 39   | 62   | 19   | 23   | 30   |

|     |                 |      |      |      |     |     |     |
|-----|-----------------|------|------|------|-----|-----|-----|
| 525 | hsa-miR-4729    | 36   | 19   | 25   | 21  | 19  | 21  |
| 526 | hsa-miR-4732-5p | 59   | 48   | 52   | 18  | 21  | 21  |
| 527 | hsa-miR-4733-5p | 47   | 44   | 41   | 18  | 20  | 23  |
| 528 | hsa-miR-4734    | 48   | 29   | 43   | 34  | 27  | 28  |
| 529 | hsa-miR-4735-5p | 20   | 19   | 68   | 14  | 29  | 26  |
| 530 | hsa-miR-4737    | 38   | 35   | 43   | 31  | 25  | 33  |
| 531 | hsa-miR-4746-5p | 96   | 97   | 100  | 55  | 56  | 54  |
| 532 | hsa-miR-4747-3p | 70   | 63   | 56   | 56  | 60  | 65  |
| 533 | hsa-miR-4750-5p | 17   | 23   | 22   | 14  | 14  | 15  |
| 534 | hsa-miR-4755-3p | 1596 | 489  | 2660 | 138 | 285 | 300 |
| 535 | hsa-miR-4757-5p | 54   | 29   | 31   | 27  | 17  | 19  |
| 536 | hsa-miR-4758-3p | 105  | 26   | 291  | 15  | 26  | 36  |
| 537 | hsa-miR-4762-3p | 31   | 27   | 33   | 17  | 26  | 19  |
| 538 | hsa-miR-4763-3p | 101  | 89   | 106  | 85  | 91  | 115 |
| 539 | hsa-miR-4763-5p | 36   | 28   | 35   | 21  | 22  | 29  |
| 540 | hsa-miR-4764-3p | 54   | 52   | 52   | 35  | 34  | 37  |
| 541 | hsa-miR-4766-5p | 113  | 120  | 101  | 88  | 83  | 85  |
| 542 | hsa-miR-4767    | 19   | 30   | 23   | 17  | 20  | 17  |
| 543 | hsa-miR-4770    | 206  | 212  | 184  | 175 | 149 | 108 |
| 544 | hsa-miR-4772-3p | 23   | 28   | 25   | 17  | 18  | 19  |
| 545 | hsa-miR-4775    | 31   | 34   | 39   | 22  | 18  | 21  |
| 546 | hsa-miR-4776-5p | 548  | 721  | 639  | 303 | 421 | 336 |
| 547 | hsa-miR-4778-5p | 89   | 50   | 100  | 46  | 46  | 92  |
| 548 | hsa-miR-4783-3p | 20   | 17   | 18   | 13  | 12  | 13  |
| 549 | hsa-miR-4786-5p | 22   | 20   | 24   | 13  | 12  | 12  |
| 550 | hsa-miR-4787-3p | 47   | 94   | 62   | 32  | 83  | 34  |
| 551 | hsa-miR-4787-5p | 19   | 19   | 18   | 13  | 11  | 14  |
| 552 | hsa-miR-4788    | 28   | 24   | 20   | 12  | 13  | 9   |
| 553 | hsa-miR-4791    | 893  | 775  | 665  | 697 | 808 | 700 |
| 554 | hsa-miR-4792    | 156  | 139  | 98   | 127 | 105 | 79  |
| 555 | hsa-miR-4795-3p | 37   | 29   | 36   | 22  | 21  | 22  |
| 556 | hsa-miR-4798-5p | 36   | 42   | 104  | 22  | 32  | 31  |
| 557 | hsa-miR-4800-3p | 26   | 48   | 59   | 17  | 24  | 24  |
| 558 | hsa-miR-484     | 773  | 1033 | 882  | 412 | 421 | 422 |
| 559 | hsa-miR-485-5p  | 766  | 524  | 545  | 522 | 513 | 605 |
| 560 | hsa-miR-486-5p  | 264  | 292  | 263  | 149 | 152 | 150 |
| 561 | hsa-miR-488-3p  | 16   | 23   | 18   | 6   | 11  | 8   |
| 562 | hsa-miR-493-5p  | 28   | 38   | 45   | 64  | 77  | 71  |
| 563 | hsa-miR-497-3p  | 39   | 26   | 38   | 15  | 15  | 32  |
| 564 | hsa-miR-497-5p  | 29   | 28   | 32   | 15  | 12  | 14  |
| 565 | hsa-miR-499a-5p | 109  | 91   | 93   | 81  | 87  | 74  |

|     |                  |      |      |      |      |     |     |
|-----|------------------|------|------|------|------|-----|-----|
| 566 | hsa-miR-499b-5p  | 125  | 144  | 128  | 121  | 105 | 79  |
| 567 | hsa-miR-5000-3p  | 148  | 175  | 150  | 95   | 133 | 104 |
| 568 | hsa-miR-5000-5p  | 22   | 17   | 22   | 14   | 12  | 10  |
| 569 | hsa-miR-5001-3p  | 19   | 17   | 24   | 11   | 12  | 14  |
| 570 | hsa-miR-5001-5p  | 28   | 30   | 29   | 27   | 21  | 21  |
| 571 | hsa-miR-5002-5p  | 144  | 84   | 195  | 43   | 63  | 64  |
| 572 | hsa-miR-5008-3p  | 26   | 24   | 27   | 16   | 14  | 19  |
| 573 | hsa-miR-5009-3p  | 137  | 103  | 135  | 59   | 90  | 74  |
| 574 | hsa-miR-500a-3p  | 594  | 447  | 436  | 232  | 197 | 277 |
| 575 | hsa-miR-501-3p   | 122  | 102  | 74   | 50   | 45  | 60  |
| 576 | hsa-miR-5010-5p  | 52   | 69   | 78   | 32   | 71  | 45  |
| 577 | hsa-miR-503-5p   | 16   | 15   | 16   | 8    | 7   | 10  |
| 578 | hsa-miR-505-3p   | 28   | 26   | 25   | 13   | 12  | 16  |
| 579 | hsa-miR-5088-5p  | 16   | 15   | 49   | 6    | 10  | 11  |
| 580 | hsa-miR-5089-3p  | 23   | 24   | 19   | 17   | 25  | 20  |
| 581 | hsa-miR-5089-5p  | 88   | 71   | 67   | 65   | 63  | 89  |
| 582 | hsa-miR-5091     | 22   | 26   | 19   | 12   | 10  | 16  |
| 583 | hsa-miR-5093     | 19   | 22   | 22   | 11   | 14  | 13  |
| 584 | hsa-miR-5094     | 15   | 16   | 16   | 9    | 8   | 13  |
| 585 | hsa-miR-5096     | 31   | 35   | 31   | 20   | 21  | 22  |
| 586 | hsa-miR-5100     | 102  | 162  | 121  | 93   | 104 | 70  |
| 587 | hsa-miR-513c-3p  | 40   | 35   | 40   | 25   | 38  | 32  |
| 588 | hsa-miR-516b-5p  | 84   | 93   | 119  | 66   | 50  | 70  |
| 589 | hsa-miR-5190     | 28   | 22   | 31   | 10   | 12  | 11  |
| 590 | hsa-miR-5191     | 18   | 17   | 22   | 10   | 10  | 10  |
| 591 | hsa-miR-5192     | 32   | 36   | 30   | 25   | 23  | 18  |
| 592 | hsa-miR-5195-3p  | 77   | 59   | 103  | 60   | 61  | 72  |
| 593 | hsa-miR-5196-3p  | 559  | 958  | 1380 | 436  | 550 | 664 |
| 594 | hsa-miR-5197-3p  | 31   | 28   | 31   | 14   | 23  | 18  |
| 595 | hsa-miR-520d-3p  | 161  | 92   | 197  | 64   | 95  | 89  |
| 596 | hsa-miR-532-5p   | 279  | 215  | 224  | 114  | 126 | 104 |
| 597 | hsa-miR-539-3p   | 1558 | 1029 | 907  | 1068 | 572 | 563 |
| 598 | hsa-miR-541-3p   | 86   | 111  | 103  | 42   | 41  | 46  |
| 599 | hsa-miR-542-3p   | 195  | 146  | 208  | 71   | 81  | 82  |
| 600 | hsa-miR-548ag    | 47   | 50   | 42   | 19   | 17  | 20  |
| 601 | hsa-miR-548an    | 30   | 21   | 42   | 13   | 22  | 17  |
| 602 | hsa-miR-548aq-5p | 24   | 25   | 18   | 19   | 17  | 12  |
| 603 | hsa-miR-548aw    | 44   | 37   | 47   | 27   | 27  | 40  |
| 604 | hsa-miR-548b-3p  | 28   | 18   | 24   | 15   | 9   | 9   |
| 605 | hsa-miR-548b-5p  | 215  | 182  | 171  | 84   | 62  | 65  |
| 606 | hsa-miR-548ba    | 41   | 48   | 46   | 25   | 22  | 23  |

|     |                 |      |      |      |      |     |      |
|-----|-----------------|------|------|------|------|-----|------|
| 607 | hsa-miR-548e-3p | 126  | 115  | 101  | 69   | 65  | 57   |
| 608 | hsa-miR-548e-5p | 28   | 34   | 30   | 15   | 12  | 12   |
| 609 | hsa-miR-548f-3p | 19   | 32   | 32   | 19   | 26  | 27   |
| 610 | hsa-miR-548h-5p | 53   | 45   | 45   | 23   | 16  | 20   |
| 611 | hsa-miR-548k    | 323  | 304  | 274  | 149  | 105 | 112  |
| 612 | hsa-miR-548m    | 132  | 72   | 121  | 55   | 56  | 64   |
| 613 | hsa-miR-548o-3p | 116  | 88   | 91   | 50   | 32  | 31   |
| 614 | hsa-miR-548y    | 25   | 21   | 18   | 12   | 15  | 15   |
| 615 | hsa-miR-550a-5p | 100  | 86   | 81   | 41   | 30  | 46   |
| 616 | hsa-miR-552-3p  | 28   | 28   | 30   | 18   | 15  | 19   |
| 617 | hsa-miR-553     | 47   | 50   | 47   | 36   | 30  | 31   |
| 618 | hsa-miR-5582-3p | 16   | 22   | 27   | 10   | 11  | 10   |
| 619 | hsa-miR-5585-3p | 81   | 86   | 96   | 42   | 56  | 65   |
| 620 | hsa-miR-5587-3p | 23   | 24   | 22   | 17   | 12  | 18   |
| 621 | hsa-miR-5589-5p | 220  | 202  | 326  | 306  | 278 | 360  |
| 622 | hsa-miR-559     | 1197 | 1013 | 1373 | 709  | 823 | 1166 |
| 623 | hsa-miR-561-5p  | 576  | 528  | 395  | 219  | 161 | 132  |
| 624 | hsa-miR-563     | 21   | 24   | 28   | 16   | 19  | 12   |
| 625 | hsa-miR-566     | 94   | 96   | 100  | 66   | 76  | 105  |
| 626 | hsa-miR-567     | 93   | 83   | 110  | 65   | 70  | 90   |
| 627 | hsa-miR-5683    | 45   | 45   | 57   | 32   | 35  | 30   |
| 628 | hsa-miR-5685    | 392  | 336  | 375  | 263  | 267 | 358  |
| 629 | hsa-miR-5688    | 178  | 169  | 197  | 92   | 107 | 130  |
| 630 | hsa-miR-5689    | 46   | 42   | 53   | 30   | 32  | 35   |
| 631 | hsa-miR-5691    | 72   | 43   | 84   | 29   | 35  | 38   |
| 632 | hsa-miR-5693    | 78   | 46   | 112  | 37   | 43  | 39   |
| 633 | hsa-miR-5694    | 365  | 442  | 441  | 322  | 350 | 328  |
| 634 | hsa-miR-5699-3p | 197  | 217  | 161  | 129  | 121 | 74   |
| 635 | hsa-miR-5699-5p | 31   | 25   | 35   | 16   | 15  | 14   |
| 636 | hsa-miR-5701    | 23   | 17   | 43   | 12   | 15  | 13   |
| 637 | hsa-miR-5706    | 24   | 23   | 19   | 13   | 16  | 9    |
| 638 | hsa-miR-5707    | 48   | 43   | 51   | 40   | 35  | 32   |
| 639 | hsa-miR-5708    | 33   | 29   | 28   | 14   | 11  | 16   |
| 640 | hsa-miR-571     | 22   | 18   | 26   | 11   | 14  | 13   |
| 641 | hsa-miR-573     | 61   | 58   | 47   | 55   | 58  | 50   |
| 642 | hsa-miR-576-3p  | 138  | 118  | 136  | 100  | 86  | 89   |
| 643 | hsa-miR-576-5p  | 52   | 37   | 44   | 15   | 12  | 15   |
| 644 | hsa-miR-577     | 2355 | 2168 | 2102 | 1066 | 952 | 1154 |
| 645 | hsa-miR-5787    | 203  | 191  | 164  | 181  | 180 | 220  |
| 646 | hsa-miR-579-3p  | 74   | 85   | 63   | 47   | 48  | 34   |
| 647 | hsa-miR-580-3p  | 646  | 645  | 428  | 582  | 665 | 441  |



|     |                |       |       |       |       |       |       |
|-----|----------------|-------|-------|-------|-------|-------|-------|
| 648 | hsa-miR-580-5p | 98    | 89    | 101   | 53    | 66    | 53    |
| 649 | hsa-miR-582-3p | 296   | 433   | 174   | 135   | 146   | 64    |
| 650 | hsa-miR-582-5p | 51    | 70    | 33    | 20    | 27    | 16    |
| 651 | hsa-miR-584-5p | 17    | 17    | 32    | 7     | 10    | 12    |
| 652 | hsa-miR-586    | 21    | 16    | 20    | 12    | 11    | 12    |
| 653 | hsa-miR-587    | 117   | 97    | 124   | 82    | 88    | 108   |
| 654 | hsa-miR-589-3p | 34    | 45    | 50    | 25    | 23    | 23    |
| 655 | hsa-miR-589-5p | 260   | 277   | 264   | 132   | 131   | 142   |
| 656 | hsa-miR-590-3p | 110   | 121   | 86    | 67    | 49    | 41    |
| 657 | hsa-miR-596    | 32    | 30    | 77    | 27    | 21    | 18    |
| 658 | hsa-miR-598-3p | 116   | 93    | 94    | 57    | 51    | 40    |
| 659 | hsa-miR-598-5p | 108   | 78    | 89    | 73    | 56    | 70    |
| 660 | hsa-miR-600    | 104   | 82    | 87    | 49    | 42    | 44    |
| 661 | hsa-miR-601    | 27    | 28    | 28    | 15    | 26    | 23    |
| 662 | hsa-miR-605-3p | 446   | 436   | 365   | 380   | 401   | 312   |
| 663 | hsa-miR-606    | 17    | 19    | 20    | 14    | 14    | 15    |
| 664 | hsa-miR-6076   | 18    | 15    | 15    | 10    | 7     | 8     |
| 665 | hsa-miR-6079   | 38    | 27    | 30    | 27    | 21    | 25    |
| 666 | hsa-miR-6080   | 17707 | 23983 | 31583 | 16684 | 13966 | 15192 |
| 667 | hsa-miR-6081   | 122   | 62    | 117   | 53    | 22    | 54    |
| 668 | hsa-miR-6082   | 28    | 29    | 81    | 18    | 21    | 14    |
| 669 | hsa-miR-6083   | 25    | 19    | 28    | 12    | 13    | 13    |
| 670 | hsa-miR-6086   | 640   | 667   | 580   | 275   | 373   | 299   |
| 671 | hsa-miR-6089   | 26    | 29    | 25    | 18    | 23    | 22    |
| 672 | hsa-miR-609    | 35    | 24    | 38    | 13    | 16    | 10    |
| 673 | hsa-miR-612    | 26    | 18    | 33    | 9     | 11    | 14    |
| 674 | hsa-miR-6126   | 80    | 75    | 94    | 61    | 59    | 51    |
| 675 | hsa-miR-6132   | 117   | 114   | 162   | 96    | 90    | 109   |
| 676 | hsa-miR-6133   | 32    | 36    | 32    | 18    | 36    | 32    |
| 677 | hsa-miR-615-3p | 468   | 555   | 400   | 201   | 187   | 178   |
| 678 | hsa-miR-615-5p | 160   | 182   | 129   | 131   | 102   | 96    |
| 679 | hsa-miR-618    | 37    | 47    | 44    | 20    | 28    | 22    |
| 680 | hsa-miR-619-5p | 42    | 33    | 43    | 18    | 22    | 29    |
| 681 | hsa-miR-624-5p | 91    | 83    | 110   | 68    | 70    | 69    |
| 682 | hsa-miR-625-3p | 19    | 20    | 19    | 10    | 10    | 11    |
| 683 | hsa-miR-625-5p | 75    | 55    | 46    | 35    | 25    | 35    |
| 684 | hsa-miR-628-5p | 61    | 72    | 57    | 29    | 21    | 22    |
| 685 | hsa-miR-629-5p | 132   | 121   | 122   | 69    | 58    | 89    |
| 686 | hsa-miR-630    | 19    | 18    | 22    | 12    | 11    | 15    |
| 687 | hsa-miR-631    | 33    | 20    | 26    | 21    | 21    | 21    |
| 688 | hsa-miR-637    | 20    | 19    | 20    | 11    | 11    | 10    |

|     |                 |      |      |      |      |     |     |
|-----|-----------------|------|------|------|------|-----|-----|
| 689 | hsa-miR-638     | 254  | 256  | 217  | 207  | 174 | 146 |
| 690 | hsa-miR-641     | 274  | 236  | 211  | 90   | 75  | 73  |
| 691 | hsa-miR-643     | 637  | 682  | 514  | 504  | 486 | 382 |
| 692 | hsa-miR-644a    | 288  | 345  | 346  | 308  | 281 | 296 |
| 693 | hsa-miR-6499-3p | 43   | 31   | 55   | 30   | 24  | 43  |
| 694 | hsa-miR-6499-5p | 18   | 15   | 19   | 10   | 12  | 13  |
| 695 | hsa-miR-650     | 86   | 88   | 88   | 48   | 53  | 55  |
| 696 | hsa-miR-6501-3p | 25   | 31   | 30   | 19   | 26  | 19  |
| 697 | hsa-miR-6502-5p | 19   | 18   | 27   | 9    | 15  | 11  |
| 698 | hsa-miR-6503-3p | 16   | 18   | 17   | 11   | 11  | 13  |
| 699 | hsa-miR-6503-5p | 189  | 288  | 233  | 194  | 211 | 148 |
| 700 | hsa-miR-6506-5p | 35   | 35   | 29   | 39   | 38  | 28  |
| 701 | hsa-miR-651-5p  | 27   | 24   | 31   | 64   | 97  | 104 |
| 702 | hsa-miR-6510-3p | 15   | 15   | 19   | 10   | 9   | 12  |
| 703 | hsa-miR-6512-3p | 38   | 29   | 58   | 17   | 24  | 21  |
| 704 | hsa-miR-6513-3p | 64   | 81   | 65   | 81   | 67  | 64  |
| 705 | hsa-miR-652-3p  | 56   | 62   | 42   | 29   | 31  | 34  |
| 706 | hsa-miR-660-5p  | 226  | 199  | 172  | 139  | 103 | 89  |
| 707 | hsa-miR-662     | 595  | 1025 | 877  | 448  | 560 | 552 |
| 708 | hsa-miR-663a    | 35   | 36   | 48   | 44   | 38  | 44  |
| 709 | hsa-miR-663b    | 30   | 28   | 42   | 22   | 22  | 21  |
| 710 | hsa-miR-664b-5p | 66   | 64   | 43   | 40   | 43  | 32  |
| 711 | hsa-miR-665     | 31   | 25   | 35   | 16   | 19  | 21  |
| 712 | hsa-miR-668-3p  | 154  | 69   | 223  | 84   | 67  | 114 |
| 713 | hsa-miR-671-3p  | 95   | 88   | 108  | 44   | 53  | 49  |
| 714 | hsa-miR-671-5p  | 56   | 77   | 66   | 19   | 16  | 18  |
| 715 | hsa-miR-6717-5p | 430  | 368  | 602  | 162  | 198 | 238 |
| 716 | hsa-miR-6719-3p | 664  | 762  | 485  | 584  | 577 | 373 |
| 717 | hsa-miR-6723-5p | 34   | 28   | 23   | 16   | 14  | 19  |
| 718 | hsa-miR-6724-5p | 59   | 72   | 67   | 38   | 37  | 41  |
| 719 | hsa-miR-6726-3p | 30   | 40   | 22   | 24   | 28  | 19  |
| 720 | hsa-miR-6728-5p | 15   | 18   | 62   | 12   | 9   | 11  |
| 721 | hsa-miR-6729-5p | 21   | 17   | 16   | 13   | 14  | 14  |
| 722 | hsa-miR-6730-3p | 752  | 902  | 657  | 522  | 563 | 530 |
| 723 | hsa-miR-6731-3p | 55   | 61   | 49   | 42   | 43  | 33  |
| 724 | hsa-miR-6735-3p | 2400 | 1683 | 1275 | 1131 | 659 | 594 |
| 725 | hsa-miR-6735-5p | 22   | 16   | 16   | 9    | 9   | 11  |
| 726 | hsa-miR-6737-5p | 18   | 15   | 17   | 12   | 11  | 12  |
| 727 | hsa-miR-6739-5p | 24   | 35   | 31   | 23   | 20  | 24  |
| 728 | hsa-miR-6743-5p | 22   | 20   | 27   | 16   | 13  | 15  |
| 729 | hsa-miR-6746-3p | 112  | 126  | 112  | 79   | 88  | 64  |

|     |                  |      |      |      |     |     |     |
|-----|------------------|------|------|------|-----|-----|-----|
| 730 | hsa-miR-6749-5p  | 37   | 29   | 36   | 16  | 13  | 17  |
| 731 | hsa-miR-675-5p   | 54   | 44   | 130  | 32  | 39  | 36  |
| 732 | hsa-miR-6755-3p  | 36   | 19   | 40   | 17  | 15  | 16  |
| 733 | hsa-miR-6757-5p  | 1741 | 281  | 4266 | 163 | 441 | 472 |
| 734 | hsa-miR-676-3p   | 25   | 30   | 27   | 13  | 13  | 17  |
| 735 | hsa-miR-6761-5p  | 47   | 42   | 24   | 31  | 27  | 25  |
| 736 | hsa-miR-6763-3p  | 24   | 29   | 33   | 20  | 14  | 13  |
| 737 | hsa-miR-6765-3p  | 988  | 1382 | 1006 | 770 | 792 | 764 |
| 738 | hsa-miR-6768-5p  | 16   | 20   | 21   | 10  | 9   | 11  |
| 739 | hsa-miR-6769a-3p | 47   | 35   | 91   | 13  | 14  | 13  |
| 740 | hsa-miR-6770-3p  | 19   | 15   | 22   | 11  | 8   | 12  |
| 741 | hsa-miR-6772-5p  | 214  | 182  | 244  | 132 | 142 | 171 |
| 742 | hsa-miR-6773-5p  | 18   | 18   | 19   | 10  | 12  | 10  |
| 743 | hsa-miR-6776-3p  | 28   | 21   | 37   | 15  | 26  | 21  |
| 744 | hsa-miR-6780a-3p | 79   | 69   | 87   | 50  | 31  | 51  |
| 745 | hsa-miR-6783-3p  | 26   | 22   | 46   | 10  | 12  | 14  |
| 746 | hsa-miR-6784-3p  | 37   | 29   | 66   | 16  | 29  | 25  |
| 747 | hsa-miR-6784-5p  | 27   | 22   | 31   | 21  | 16  | 22  |
| 748 | hsa-miR-6785-3p  | 126  | 191  | 172  | 83  | 82  | 101 |
| 749 | hsa-miR-6785-5p  | 39   | 22   | 54   | 10  | 14  | 15  |
| 750 | hsa-miR-6786-3p  | 34   | 19   | 30   | 14  | 16  | 16  |
| 751 | hsa-miR-6787-5p  | 65   | 57   | 41   | 38  | 40  | 33  |
| 752 | hsa-miR-6788-5p  | 38   | 19   | 25   | 20  | 17  | 22  |
| 753 | hsa-miR-6789-5p  | 560  | 792  | 602  | 530 | 574 | 510 |
| 754 | hsa-miR-6792-5p  | 65   | 53   | 81   | 44  | 52  | 66  |
| 755 | hsa-miR-6797-5p  | 26   | 24   | 44   | 16  | 15  | 19  |
| 756 | hsa-miR-6805-3p  | 21   | 23   | 34   | 10  | 12  | 17  |
| 757 | hsa-miR-6806-5p  | 27   | 28   | 30   | 19  | 21  | 35  |
| 758 | hsa-miR-6809-5p  | 19   | 18   | 21   | 12  | 12  | 11  |
| 759 | hsa-miR-6815-5p  | 24   | 26   | 23   | 19  | 14  | 15  |
| 760 | hsa-miR-6816-5p  | 549  | 832  | 547  | 341 | 475 | 321 |
| 761 | hsa-miR-6819-5p  | 23   | 18   | 25   | 18  | 10  | 13  |
| 762 | hsa-miR-6821-5p  | 19   | 20   | 34   | 13  | 16  | 13  |
| 763 | hsa-miR-6822-3p  | 15   | 17   | 28   | 10  | 16  | 11  |
| 764 | hsa-miR-6822-5p  | 70   | 143  | 95   | 75  | 80  | 79  |
| 765 | hsa-miR-6824-5p  | 23   | 19   | 19   | 13  | 12  | 15  |
| 766 | hsa-miR-6825-3p  | 20   | 23   | 28   | 13  | 15  | 14  |
| 767 | hsa-miR-6826-3p  | 53   | 81   | 45   | 39  | 62  | 31  |
| 768 | hsa-miR-6826-5p  | 400  | 497  | 441  | 227 | 241 | 254 |
| 769 | hsa-miR-6832-3p  | 208  | 157  | 317  | 83  | 130 | 122 |
| 770 | hsa-miR-6836-3p  | 27   | 45   | 43   | 22  | 34  | 36  |

|     |                 |     |     |     |     |     |     |
|-----|-----------------|-----|-----|-----|-----|-----|-----|
| 771 | hsa-miR-6837-3p | 17  | 22  | 22  | 10  | 10  | 9   |
| 772 | hsa-miR-6839-5p | 63  | 67  | 196 | 34  | 47  | 33  |
| 773 | hsa-miR-6840-5p | 37  | 45  | 53  | 28  | 29  | 36  |
| 774 | hsa-miR-6842-3p | 22  | 27  | 30  | 15  | 17  | 16  |
| 775 | hsa-miR-6844    | 64  | 64  | 80  | 41  | 42  | 67  |
| 776 | hsa-miR-6852-3p | 56  | 29  | 57  | 36  | 18  | 26  |
| 777 | hsa-miR-6852-5p | 25  | 16  | 28  | 8   | 10  | 9   |
| 778 | hsa-miR-6853-3p | 93  | 43  | 136 | 18  | 31  | 30  |
| 779 | hsa-miR-6854-5p | 50  | 49  | 65  | 30  | 30  | 34  |
| 780 | hsa-miR-6855-5p | 98  | 66  | 99  | 44  | 51  | 76  |
| 781 | hsa-miR-6856-5p | 26  | 22  | 23  | 14  | 17  | 21  |
| 782 | hsa-miR-6859-3p | 15  | 16  | 17  | 9   | 10  | 12  |
| 783 | hsa-miR-6859-5p | 38  | 29  | 152 | 13  | 19  | 18  |
| 784 | hsa-miR-6868-5p | 35  | 39  | 35  | 19  | 22  | 23  |
| 785 | hsa-miR-6869-3p | 34  | 26  | 35  | 31  | 18  | 24  |
| 786 | hsa-miR-6869-5p | 104 | 103 | 124 | 156 | 100 | 113 |
| 787 | hsa-miR-6872-3p | 92  | 110 | 111 | 62  | 68  | 91  |
| 788 | hsa-miR-6876-3p | 23  | 24  | 50  | 19  | 20  | 31  |
| 789 | hsa-miR-6877-3p | 17  | 25  | 20  | 17  | 20  | 15  |
| 790 | hsa-miR-6878-5p | 168 | 163 | 206 | 109 | 144 | 147 |
| 791 | hsa-miR-6881-3p | 35  | 15  | 27  | 31  | 4   | 14  |
| 792 | hsa-miR-6892-5p | 30  | 30  | 40  | 22  | 19  | 25  |
| 793 | hsa-miR-6894-5p | 34  | 34  | 47  | 17  | 21  | 27  |
| 794 | hsa-miR-7-1-3p  | 24  | 28  | 21  | 13  | 12  | 12  |
| 795 | hsa-miR-7-2-3p  | 41  | 44  | 39  | 26  | 28  | 20  |
| 796 | hsa-miR-7-5p    | 19  | 18  | 61  | 5   | 4   | 5   |
| 797 | hsa-miR-708-3p  | 53  | 49  | 52  | 41  | 26  | 22  |
| 798 | hsa-miR-708-5p  | 42  | 42  | 38  | 25  | 24  | 25  |
| 799 | hsa-miR-711     | 62  | 95  | 48  | 53  | 53  | 74  |
| 800 | hsa-miR-7151-3p | 30  | 33  | 40  | 15  | 17  | 25  |
| 801 | hsa-miR-7153-5p | 26  | 26  | 27  | 21  | 18  | 13  |
| 802 | hsa-miR-7156-5p | 29  | 32  | 34  | 20  | 23  | 19  |
| 803 | hsa-miR-7159-5p | 52  | 55  | 61  | 32  | 39  | 32  |
| 804 | hsa-miR-7160-5p | 20  | 18  | 19  | 13  | 10  | 13  |
| 805 | hsa-miR-7161-3p | 259 | 265 | 952 | 157 | 255 | 164 |
| 806 | hsa-miR-7161-5p | 28  | 20  | 32  | 40  | 27  | 20  |
| 807 | hsa-miR-718     | 196 | 137 | 164 | 132 | 115 | 94  |
| 808 | hsa-miR-744-3p  | 18  | 16  | 17  | 7   | 8   | 8   |
| 809 | hsa-miR-744-5p  | 637 | 725 | 600 | 343 | 291 | 292 |
| 810 | hsa-miR-7515    | 72  | 57  | 161 | 48  | 48  | 50  |
| 811 | hsa-miR-761     | 31  | 45  | 142 | 19  | 32  | 33  |

|     |                 |      |      |      |      |      |      |
|-----|-----------------|------|------|------|------|------|------|
| 812 | hsa-miR-762     | 471  | 519  | 444  | 391  | 356  | 329  |
| 813 | hsa-miR-7641    | 64   | 31   | 380  | 16   | 18   | 21   |
| 814 | hsa-miR-767-5p  | 47   | 34   | 134  | 19   | 23   | 18   |
| 815 | hsa-miR-769-3p  | 21   | 21   | 23   | 10   | 11   | 13   |
| 816 | hsa-miR-769-5p  | 574  | 641  | 644  | 150  | 130  | 168  |
| 817 | hsa-miR-7703    | 2951 | 2671 | 2368 | 2111 | 1941 | 2004 |
| 818 | hsa-miR-7704    | 97   | 109  | 115  | 83   | 82   | 81   |
| 819 | hsa-miR-7705    | 540  | 556  | 483  | 432  | 387  | 371  |
| 820 | hsa-miR-7706    | 101  | 104  | 164  | 53   | 96   | 94   |
| 821 | hsa-miR-7844-5p | 22   | 16   | 20   | 9    | 12   | 15   |
| 822 | hsa-miR-7846-3p | 45   | 33   | 33   | 29   | 26   | 26   |
| 823 | hsa-miR-7847-3p | 22   | 20   | 25   | 13   | 10   | 12   |
| 824 | hsa-miR-7974    | 1162 | 742  | 818  | 775  | 613  | 635  |
| 825 | hsa-miR-7977    | 487  | 604  | 503  | 317  | 412  | 466  |
| 826 | hsa-miR-8054    | 34   | 36   | 30   | 23   | 18   | 14   |
| 827 | hsa-miR-8058    | 366  | 391  | 302  | 290  | 314  | 257  |
| 828 | hsa-miR-8059    | 20   | 18   | 24   | 14   | 12   | 12   |
| 829 | hsa-miR-8061    | 46   | 62   | 61   | 30   | 58   | 32   |
| 830 | hsa-miR-8062    | 20   | 20   | 18   | 12   | 16   | 14   |
| 831 | hsa-miR-8063    | 21   | 23   | 32   | 13   | 18   | 15   |
| 832 | hsa-miR-8065    | 24   | 16   | 28   | 12   | 22   | 12   |
| 833 | hsa-miR-8069    | 52   | 83   | 85   | 50   | 74   | 52   |
| 834 | hsa-miR-8072    | 40   | 39   | 41   | 28   | 28   | 38   |
| 835 | hsa-miR-8073    | 16   | 17   | 21   | 13   | 13   | 15   |
| 836 | hsa-miR-8074    | 32   | 30   | 37   | 17   | 24   | 22   |
| 837 | hsa-miR-8075    | 34   | 34   | 102  | 25   | 30   | 22   |
| 838 | hsa-miR-8076    | 24   | 22   | 21   | 13   | 13   | 12   |
| 839 | hsa-miR-8078    | 19   | 20   | 16   | 18   | 14   | 16   |
| 840 | hsa-miR-8082    | 136  | 134  | 134  | 120  | 141  | 115  |
| 841 | hsa-miR-8083    | 20   | 24   | 21   | 10   | 11   | 12   |
| 842 | hsa-miR-8088    | 16   | 21   | 20   | 8    | 11   | 11   |
| 843 | hsa-miR-873-3p  | 95   | 116  | 87   | 68   | 65   | 60   |
| 844 | hsa-miR-874-3p  | 145  | 199  | 119  | 77   | 73   | 71   |
| 845 | hsa-miR-875-3p  | 25   | 28   | 19   | 15   | 15   | 17   |
| 846 | hsa-miR-877-5p  | 61   | 58   | 49   | 21   | 20   | 20   |
| 847 | hsa-miR-885-3p  | 54   | 63   | 71   | 28   | 38   | 38   |
| 848 | hsa-miR-887-3p  | 24   | 33   | 24   | 11   | 11   | 13   |
| 849 | hsa-miR-887-5p  | 49   | 49   | 52   | 24   | 24   | 25   |
| 850 | hsa-miR-889-5p  | 22   | 21   | 29   | 17   | 14   | 16   |
| 851 | hsa-miR-891a-3p | 16   | 17   | 22   | 8    | 8    | 7    |
| 852 | hsa-miR-891a-5p | 54   | 36   | 51   | 21   | 21   | 29   |

|     |                  |       |       |       |       |       |       |
|-----|------------------|-------|-------|-------|-------|-------|-------|
| 853 | hsa-miR-892a     | 24    | 21    | 18    | 18    | 15    | 9     |
| 854 | hsa-miR-892c-3p  | 78    | 88    | 63    | 62    | 68    | 39    |
| 855 | hsa-miR-9-3p     | 127   | 134   | 169   | 69    | 78    | 72    |
| 856 | hsa-miR-9-5p     | 524   | 674   | 520   | 201   | 206   | 173   |
| 857 | hsa-miR-921      | 15    | 18    | 19    | 8     | 9     | 7     |
| 858 | hsa-miR-922      | 40    | 34    | 33    | 20    | 27    | 23    |
| 859 | hsa-miR-92a-1-5p | 79    | 37    | 70    | 13    | 12    | 21    |
| 860 | hsa-miR-92a-3p   | 38489 | 22715 | 42878 | 20666 | 12476 | 21160 |
| 861 | hsa-miR-92b-3p   | 2405  | 2625  | 2576  | 1113  | 901   | 917   |
| 862 | hsa-miR-93-3p    | 63    | 45    | 81    | 27    | 30    | 41    |
| 863 | hsa-miR-93-5p    | 2800  | 2635  | 2972  | 1355  | 1427  | 1467  |
| 864 | hsa-miR-937-3p   | 102   | 91    | 142   | 65    | 88    | 76    |
| 865 | hsa-miR-938      | 877   | 856   | 1028  | 419   | 493   | 551   |
| 866 | hsa-miR-939-5p   | 18    | 17    | 21    | 13    | 15    | 11    |
| 867 | hsa-miR-940      | 21    | 34    | 26    | 13    | 15    | 13    |
| 868 | hsa-miR-941      | 1016  | 855   | 1139  | 338   | 316   | 462   |
| 869 | hsa-miR-942-3p   | 66    | 44    | 72    | 32    | 36    | 37    |
| 870 | hsa-miR-942-5p   | 89    | 62    | 65    | 31    | 26    | 32    |
| 871 | hsa-miR-96-5p    | 234   | 237   | 175   | 128   | 100   | 128   |
| 872 | hsa-miR-98-5p    | 118   | 128   | 228   | 95    | 87    | 88    |
| 873 | hsa-miR-99a-3p   | 25    | 26    | 34    | 17    | 22    | 15    |
| 874 | hsa-miR-99a-5p   | 341   | 233   | 276   | 120   | 82    | 139   |
| 875 | hsa-miR-99b-3p   | 22    | 23    | 20    | 10    | 14    | 12    |
| 876 | hsa-miR-99b-5p   | 650   | 645   | 504   | 253   | 294   | 312   |
