# Supplementary material for: N6-Adenosine Methylation in MiRNAs
Source: PubMed Central journal article supplement (PMC4344304; doi:10.1371/journal.pone.0118438), 2015-02-27
Supplement: pone.0118438.s002.pdf [file pone.0118438.s002.pdf]

**Supplementary Table 2.**

List of deregulated mature miRNAs in *FTO* knockdown cells. We detected 249 miRNAs with significantly increased levels (>1.5-fold change) (a) and 35 miRNAs with significantly decreased levels (b). Means and standard deviations of three compared pairs of scrambled and *FTO* specific siRNA treated cells are given.

**a. Upregulated miRNAs in *FTO* deficient cells.**

|    | Feature          | Mean | SD   |
|----|------------------|------|------|
| 1  | hsa-miR-6505-5p  | 9.83 | 4.61 |
| 2  | hsa-miR-651-5p   | 6.49 | 1.61 |
| 3  | hsa-miR-493-5p   | 3.99 | 0.98 |
| 4  | hsa-miR-6739-3p  | 3.84 | 1.03 |
| 5  | hsa-miR-221-3p   | 2.79 | 0.40 |
| 6  | hsa-miR-4492     | 2.62 | 0.43 |
| 7  | hsa-miR-5589-5p  | 2.62 | 0.51 |
| 8  | hsa-miR-1245b-5p | 2.53 | 0.51 |
| 9  | hsa-miR-6763-5p  | 2.42 | 0.27 |
| 10 | hsa-miR-1246     | 2.41 | 0.49 |
| 11 | hsa-miR-23c      | 2.37 | 0.23 |
| 12 | hsa-miR-4489     | 2.34 | 0.97 |
| 13 | hsa-let-7b-5p    | 2.31 | 0.17 |
| 14 | hsa-miR-6869-5p  | 2.30 | 0.80 |
| 15 | hsa-miR-7161-5p  | 2.29 | 0.98 |
| 16 | hsa-miR-3681-5p  | 2.28 | 0.36 |
| 17 | hsa-miR-1324     | 2.27 | 0.09 |
| 18 | hsa-miR-663a     | 2.18 | 0.50 |
| 19 | hsa-miR-30a-3p   | 2.17 | 0.15 |
| 20 | hsa-miR-6795-3p  | 2.16 | 0.67 |
| 21 | hsa-miR-4664-5p  | 2.15 | 0.69 |
| 22 | hsa-miR-6506-5p  | 2.13 | 0.32 |
| 23 | hsa-miR-1258     | 2.11 | 0.44 |
| 24 | hsa-miR-5787     | 2.11 | 0.32 |
| 25 | hsa-miR-6758-5p  | 2.11 | 0.23 |
| 26 | hsa-miR-127-5p   | 2.10 | 0.67 |
| 27 | hsa-miR-5682     | 2.09 | 0.20 |
| 28 | hsa-miR-6513-3p  | 2.07 | 0.54 |
| 29 | hsa-miR-1257     | 2.04 | 0.25 |
| 30 | hsa-miR-646      | 2.03 | 0.68 |
| 31 | hsa-miR-635      | 2.02 | 0.44 |
| 32 | hsa-miR-302a-5p  | 2.02 | 0.03 |
| 33 | hsa-miR-6090     | 2.02 | 0.47 |

|    |                 |      |      |
|----|-----------------|------|------|
| 34 | hsa-miR-3616-3p | 2.01 | 0.43 |
| 35 | hsa-miR-4502    | 1.99 | 0.38 |
| 36 | hsa-miR-580-3p  | 1.99 | 0.13 |
| 37 | hsa-miR-573     | 1.98 | 0.06 |
| 38 | hsa-miR-4763-3p | 1.98 | 0.18 |
| 39 | hsa-miR-144-3p  | 1.97 | 0.43 |
| 40 | hsa-miR-3609    | 1.97 | 0.24 |
| 41 | hsa-miR-5088-3p | 1.97 | 0.70 |
| 42 | hsa-miR-5089-5p | 1.96 | 0.45 |
| 43 | hsa-miR-924     | 1.95 | 0.38 |
| 44 | hsa-miR-4747-3p | 1.94 | 0.22 |
| 45 | hsa-miR-6088    | 1.93 | 0.45 |
| 46 | hsa-miR-152-3p  | 1.93 | 0.16 |
| 47 | hsa-miR-200b-5p | 1.93 | 0.35 |
| 48 | hsa-miR-4791    | 1.92 | 0.25 |
| 49 | hsa-miR-711     | 1.92 | 0.83 |
| 50 | hsa-miR-4483    | 1.92 | 0.54 |
| 51 | hsa-miR-1182    | 1.92 | 0.73 |
| 52 | hsa-miR-4423-5p | 1.92 | 0.81 |
| 53 | hsa-miR-1275    | 1.92 | 0.41 |
| 54 | hsa-let-7f-2-3p | 1.89 | 0.52 |
| 55 | hsa-miR-8082    | 1.88 | 0.30 |
| 56 | hsa-miR-5089-3p | 1.88 | 0.26 |
| 57 | hsa-miR-1203    | 1.87 | 0.60 |
| 58 | hsa-miR-6791-5p | 1.87 | 0.78 |
| 59 | hsa-miR-668-5p  | 1.86 | 0.70 |
| 60 | hsa-miR-644a    | 1.85 | 0.38 |
| 61 | hsa-miR-506-3p  | 1.85 | 0.23 |
| 62 | hsa-miR-30e-3p  | 1.85 | 0.04 |
| 63 | hsa-miR-382-5p  | 1.85 | 0.80 |
| 64 | hsa-miR-3607-5p | 1.84 | 0.43 |
| 65 | hsa-miR-485-5p  | 1.84 | 0.34 |
| 66 | hsa-miR-4475    | 1.84 | 0.32 |
| 67 | hsa-miR-4731-5p | 1.82 | 0.82 |
| 68 | hsa-miR-3617-3p | 1.82 | 0.47 |
| 69 | hsa-miR-3920    | 1.82 | 0.20 |
| 70 | hsa-miR-1238-5p | 1.81 | 0.56 |
| 71 | hsa-miR-656-5p  | 1.80 | 0.76 |
| 72 | hsa-miR-548f-3p | 1.77 | 0.30 |
| 73 | hsa-miR-4485    | 1.77 | 0.30 |
| 74 | hsa-miR-605-3p  | 1.77 | 0.17 |
| 75 | hsa-miR-8078    | 1.76 | 0.29 |
| 76 | hsa-miR-3195    | 1.76 | 0.38 |
| 77 | hsa-miR-6806-5p | 1.76 | 0.35 |

|     |                  |      |      |
|-----|------------------|------|------|
| 78  | hsa-miR-4517     | 1.75 | 0.12 |
| 79  | hsa-miR-4444     | 1.75 | 0.34 |
| 80  | hsa-miR-3680-3p  | 1.75 | 0.40 |
| 81  | hsa-miR-4677-5p  | 1.75 | 0.28 |
| 82  | hsa-miR-4634     | 1.74 | 0.40 |
| 83  | hsa-miR-19a-5p   | 1.74 | 0.22 |
| 84  | hsa-miR-4256     | 1.74 | 0.13 |
| 85  | hsa-miR-3943     | 1.74 | 0.53 |
| 86  | hsa-miR-4701-5p  | 1.73 | 0.40 |
| 87  | hsa-miR-4521     | 1.73 | 0.43 |
| 88  | hsa-miR-4707-5p  | 1.73 | 0.41 |
| 89  | hsa-miR-6759-5p  | 1.73 | 0.61 |
| 90  | hsa-miR-5579-3p  | 1.72 | 0.30 |
| 91  | hsa-miR-4670-5p  | 1.72 | 0.27 |
| 92  | hsa-miR-5703     | 1.72 | 0.63 |
| 93  | hsa-miR-1266-3p  | 1.72 | 0.23 |
| 94  | hsa-miR-4515     | 1.72 | 0.26 |
| 95  | hsa-miR-4717-3p  | 1.72 | 0.52 |
| 96  | hsa-miR-6125     | 1.72 | 0.45 |
| 97  | hsa-miR-6877-3p  | 1.72 | 0.40 |
| 98  | hsa-miR-6133     | 1.71 | 0.46 |
| 99  | hsa-miR-363-5p   | 1.71 | 0.27 |
| 100 | hsa-miR-4488     | 1.71 | 0.14 |
| 101 | hsa-miR-1261     | 1.70 | 0.10 |
| 102 | hsa-miR-145-3p   | 1.70 | 0.20 |
| 103 | hsa-miR-5195-3p  | 1.70 | 0.43 |
| 104 | hsa-miR-4722-3p  | 1.70 | 0.46 |
| 105 | hsa-miR-1181     | 1.70 | 0.57 |
| 106 | hsa-miR-1237-5p  | 1.70 | 0.35 |
| 107 | hsa-miR-3622b-3p | 1.70 | 0.14 |
| 108 | hsa-miR-6789-5p  | 1.70 | 0.28 |
| 109 | hsa-let-7i-5p    | 1.70 | 0.35 |
| 110 | hsa-miR-337-3p   | 1.69 | 0.37 |
| 111 | hsa-miR-6780b-5p | 1.69 | 0.34 |
| 112 | hsa-miR-566      | 1.69 | 0.23 |
| 113 | hsa-miR-499a-5p  | 1.68 | 0.28 |
| 114 | hsa-miR-3940-5p  | 1.68 | 0.21 |
| 115 | hsa-miR-3192-3p  | 1.68 | 0.61 |
| 116 | hsa-miR-513c-3p  | 1.68 | 0.48 |
| 117 | hsa-miR-4711-3p  | 1.68 | 0.14 |
| 118 | hsa-miR-8069     | 1.68 | 0.48 |
| 119 | hsa-miR-631      | 1.67 | 0.45 |
| 120 | hsa-miR-3942-5p  | 1.67 | 0.31 |
| 121 | hsa-miR-3150b-3p | 1.67 | 0.17 |

|     |                  |      |      |
|-----|------------------|------|------|
| 122 | hsa-miR-3928-5p  | 1.67 | 0.02 |
| 123 | hsa-miR-6792-5p  | 1.66 | 0.34 |
| 124 | hsa-miR-1263     | 1.66 | 0.19 |
| 125 | hsa-miR-587      | 1.66 | 0.20 |
| 126 | hsa-miR-1272     | 1.66 | 0.05 |
| 127 | hsa-miR-6822-5p  | 1.66 | 0.57 |
| 128 | hsa-miR-3960     | 1.66 | 0.43 |
| 129 | hsa-miR-1250-5p  | 1.66 | 0.20 |
| 130 | hsa-miR-8066     | 1.65 | 0.39 |
| 131 | hsa-miR-298      | 1.65 | 0.20 |
| 132 | hsa-miR-136-5p   | 1.65 | 0.32 |
| 133 | hsa-miR-4535     | 1.65 | 0.34 |
| 134 | hsa-miR-30b-3p   | 1.65 | 0.32 |
| 135 | hsa-miR-8058     | 1.64 | 0.06 |
| 136 | hsa-miR-3934-5p  | 1.64 | 0.39 |
| 137 | hsa-miR-6722-3p  | 1.64 | 0.28 |
| 138 | hsa-miR-6836-3p  | 1.64 | 0.11 |
| 139 | hsa-miR-3652     | 1.63 | 0.40 |
| 140 | hsa-miR-653-3p   | 1.63 | 0.29 |
| 141 | hsa-miR-3682-3p  | 1.63 | 0.20 |
| 142 | hsa-miR-5694     | 1.63 | 0.26 |
| 143 | hsa-miR-3944-3p  | 1.63 | 0.17 |
| 144 | hsa-miR-4999-5p  | 1.63 | 0.24 |
| 145 | hsa-miR-431-3p   | 1.63 | 0.42 |
| 146 | hsa-miR-6503-5p  | 1.63 | 0.52 |
| 147 | hsa-miR-4745-3p  | 1.62 | 0.38 |
| 148 | hsa-miR-4699-3p  | 1.62 | 0.24 |
| 149 | hsa-miR-3662     | 1.62 | 0.05 |
| 150 | hsa-miR-4652-5p  | 1.62 | 0.45 |
| 151 | hsa-miR-26b-5p   | 1.62 | 0.32 |
| 152 | hsa-miR-5001-5p  | 1.62 | 0.39 |
| 153 | hsa-miR-6719-3p  | 1.62 | 0.23 |
| 154 | hsa-miR-29b-2-5p | 1.62 | 0.34 |
| 155 | hsa-miR-4417     | 1.61 | 0.25 |
| 156 | hsa-miR-5685     | 1.61 | 0.17 |
| 157 | hsa-miR-521      | 1.61 | 0.50 |
| 158 | hsa-miR-137      | 1.61 | 0.27 |
| 159 | hsa-miR-1908-3p  | 1.61 | 0.36 |
| 160 | hsa-miR-6863     | 1.61 | 0.23 |
| 161 | hsa-miR-6827-5p  | 1.60 | 0.41 |
| 162 | hsa-miR-3614-5p  | 1.60 | 0.16 |
| 163 | hsa-miR-3182     | 1.60 | 0.10 |
| 164 | hsa-miR-4729     | 1.60 | 0.39 |
| 165 | hsa-miR-6726-3p  | 1.60 | 0.14 |

|     |                  |      |      |
|-----|------------------|------|------|
| 166 | hsa-miR-508-5p   | 1.60 | 0.35 |
| 167 | hsa-miR-4504     | 1.59 | 0.40 |
| 168 | hsa-miR-4792     | 1.59 | 0.13 |
| 169 | hsa-miR-3163     | 1.59 | 0.36 |
| 170 | hsa-miR-4667-5p  | 1.59 | 0.34 |
| 171 | hsa-miR-1184     | 1.59 | 0.52 |
| 172 | hsa-miR-6823-5p  | 1.58 | 0.29 |
| 173 | hsa-miR-197-5p   | 1.58 | 0.28 |
| 174 | hsa-miR-6793-5p  | 1.58 | 0.18 |
| 175 | hsa-miR-98-3p    | 1.58 | 0.10 |
| 176 | hsa-miR-4747-5p  | 1.58 | 0.40 |
| 177 | hsa-miR-567      | 1.58 | 0.14 |
| 178 | hsa-miR-6089     | 1.57 | 0.07 |
| 179 | hsa-miR-4778-5p  | 1.57 | 0.41 |
| 180 | hsa-miR-499b-5p  | 1.57 | 0.47 |
| 181 | hsa-miR-1256     | 1.57 | 0.14 |
| 182 | hsa-miR-4711-5p  | 1.57 | 0.16 |
| 183 | hsa-miR-6739-5p  | 1.57 | 0.47 |
| 184 | hsa-miR-8072     | 1.57 | 0.13 |
| 185 | hsa-miR-7704     | 1.56 | 0.26 |
| 186 | hsa-miR-4497     | 1.56 | 0.16 |
| 187 | hsa-miR-6761-5p  | 1.56 | 0.32 |
| 188 | hsa-miR-4737     | 1.56 | 0.17 |
| 189 | hsa-miR-2115-3p  | 1.55 | 0.12 |
| 190 | hsa-miR-1910-3p  | 1.55 | 0.13 |
| 191 | hsa-miR-4281     | 1.55 | 0.18 |
| 192 | hsa-miR-601      | 1.55 | 0.40 |
| 193 | hsa-miR-606      | 1.55 | 0.18 |
| 194 | hsa-miR-3131     | 1.55 | 0.41 |
| 195 | hsa-miR-4734     | 1.55 | 0.35 |
| 196 | hsa-miR-4766-5p  | 1.55 | 0.11 |
| 197 | hsa-miR-4420     | 1.55 | 0.27 |
| 198 | hsa-miR-3196     | 1.55 | 0.26 |
| 199 | hsa-miR-4718     | 1.55 | 0.24 |
| 200 | hsa-miR-4524a-3p | 1.55 | 0.37 |
| 201 | hsa-miR-4767     | 1.55 | 0.33 |
| 202 | hsa-miR-4650-3p  | 1.55 | 0.32 |
| 203 | hsa-miR-4739     | 1.55 | 0.34 |
| 204 | hsa-miR-4503     | 1.55 | 0.11 |
| 205 | hsa-miR-6132     | 1.55 | 0.27 |
| 206 | hsa-miR-6845-3p  | 1.54 | 0.35 |
| 207 | hsa-miR-6079     | 1.54 | 0.06 |
| 208 | hsa-miR-8073     | 1.54 | 0.21 |
| 209 | hsa-miR-1289     | 1.54 | 0.28 |

|     |                  |      |      |
|-----|------------------|------|------|
| 210 | hsa-miR-3137     | 1.54 | 0.09 |
| 211 | hsa-miR-6816-3p  | 1.54 | 0.36 |
| 212 | hsa-miR-203b-3p  | 1.54 | 0.22 |
| 213 | hsa-miR-4292     | 1.54 | 0.43 |
| 214 | hsa-miR-6729-5p  | 1.54 | 0.20 |
| 215 | hsa-miR-6499-3p  | 1.54 | 0.10 |
| 216 | hsa-miR-6869-3p  | 1.54 | 0.35 |
| 217 | hsa-miR-5707     | 1.53 | 0.34 |
| 218 | hsa-miR-7703     | 1.53 | 0.03 |
| 219 | hsa-miR-541-5p   | 1.53 | 0.45 |
| 220 | hsa-miR-6790-3p  | 1.53 | 0.06 |
| 221 | hsa-miR-200c-3p  | 1.52 | 0.22 |
| 222 | hsa-miR-410-5p   | 1.52 | 0.28 |
| 223 | hsa-miR-7705     | 1.52 | 0.16 |
| 224 | hsa-miR-5004-3p  | 1.52 | 0.29 |
| 225 | hsa-miR-7974     | 1.52 | 0.17 |
| 226 | hsa-miR-3651     | 1.52 | 0.30 |
| 227 | hsa-miR-6788-5p  | 1.52 | 0.38 |
| 228 | hsa-miR-6515-5p  | 1.52 | 0.34 |
| 229 | hsa-miR-372-3p   | 1.52 | 0.18 |
| 230 | hsa-miR-6876-3p  | 1.52 | 0.35 |
| 231 | hsa-miR-1343-5p  | 1.52 | 0.36 |
| 232 | hsa-miR-1231     | 1.52 | 0.22 |
| 233 | hsa-miR-4524b-3p | 1.52 | 0.49 |
| 234 | hsa-miR-762      | 1.52 | 0.22 |
| 235 | hsa-miR-3692-3p  | 1.52 | 0.15 |
| 236 | hsa-miR-3923     | 1.52 | 0.14 |
| 237 | hsa-miR-33b-3p   | 1.52 | 0.33 |
| 238 | hsa-miR-3145-3p  | 1.51 | 0.35 |
| 239 | hsa-miR-643      | 1.51 | 0.16 |
| 240 | hsa-miR-3620-5p  | 1.51 | 0.33 |
| 241 | hsa-miR-6878-5p  | 1.51 | 0.28 |
| 242 | hsa-miR-559      | 1.51 | 0.22 |
| 243 | hsa-miR-3613-5p  | 1.50 | 0.19 |
| 244 | hsa-miR-4467     | 1.50 | 0.30 |
| 245 | hsa-miR-7977     | 1.50 | 0.18 |
| 246 | hsa-miR-7846-3p  | 1.50 | 0.13 |
| 247 | hsa-miR-6501-3p  | 1.50 | 0.32 |
| 248 | hsa-miR-4533     | 1.50 | 0.30 |
| 249 | hsa-miR-624-5p   | 1.50 | 0.32 |

**b. Downregulated miRNAs in *FTO* deficient cells.**

|    | Feature          | Mean | SD   |
|----|------------------|------|------|
| 1  | hsa-miR-22-3p    | 0.28 | 0.02 |
| 2  | hsa-miR-196a-5p  | 0.35 | 0.06 |
| 3  | hsa-miR-7-5p     | 0.40 | 0.23 |
| 4  | hsa-miR-769-5p   | 0.49 | 0.07 |
| 5  | hsa-miR-92a-1-5p | 0.52 | 0.17 |
| 6  | hsa-miR-671-5p   | 0.55 | 0.15 |
| 7  | hsa-miR-6769a-3p | 0.56 | 0.28 |
| 8  | hsa-miR-27b-3p   | 0.56 | 0.07 |
| 9  | hsa-miR-215-5p   | 0.61 | 0.07 |
| 10 | hsa-miR-1180-3p  | 0.63 | 0.07 |
| 11 | hsa-miR-576-5p   | 0.63 | 0.02 |
| 12 | hsa-miR-28-3p    | 0.65 | 0.03 |
| 13 | hsa-miR-25-3p    | 0.66 | 0.04 |
| 14 | hsa-miR-449c-5p  | 0.66 | 0.05 |
| 15 | hsa-miR-641      | 0.67 | 0.03 |
| 16 | hsa-miR-330-3p   | 0.67 | 0.06 |
| 17 | hsa-miR-1286     | 0.68 | 0.07 |
| 18 | hsa-miR-561-5p   | 0.69 | 0.11 |
| 19 | hsa-miR-9-5p     | 0.69 | 0.11 |
| 20 | hsa-miR-218-5p   | 0.69 | 0.12 |
| 21 | hsa-miR-195-5p   | 0.70 | 0.11 |
| 22 | hsa-miR-148a-5p  | 0.71 | 0.10 |
| 23 | hsa-miR-16-5p    | 0.71 | 0.04 |
| 24 | hsa-miR-31-5p    | 0.71 | 0.08 |
| 25 | hsa-miR-1910-5p  | 0.72 | 0.17 |
| 26 | hsa-miR-3176     | 0.72 | 0.12 |
| 27 | hsa-miR-4661-3p  | 0.73 | 0.19 |
| 28 | hsa-miR-877-5p   | 0.73 | 0.01 |
| 29 | hsa-miR-148b-5p  | 0.73 | 0.10 |
| 30 | hsa-miR-423-5p   | 0.74 | 0.04 |
| 31 | hsa-miR-941      | 0.74 | 0.03 |
| 32 | hsa-miR-181b-5p  | 0.74 | 0.11 |
| 33 | hsa-miR-548b-5p  | 0.75 | 0.08 |
| 34 | hsa-miR-30e-5p   | 0.75 | 0.19 |
| 35 | hsa-miR-21-5p    | 0.76 | 0.18 |
