# Supplementary material for: N6-Adenosine Methylation in MiRNAs
Source: PubMed Central journal article supplement (PMC4344304; doi:10.1371/journal.pone.0118438), 2015-02-27
Supplement: pone.0118438.s003.pdf [file pone.0118438.s003.pdf]

**Supplementary Table 3.** List of miRNAs significantly enriched (>2-fold change) in RNA samples immunoprecipitated with anti-me6A antibody compared to those captured by anti-IgG antibody (n=239). Means of enrichment compared to IgG samples and their standard deviations are shown.

|    | feature         | mean   | SD     |
|----|-----------------|--------|--------|
| 1  | hsa-miR-500a-3p | 485.21 | 464.98 |
| 2  | hsa-miR-103a-3p | 431.65 | 260.54 |
| 3  | hsa-miR-136-5p  | 262.50 | 202.93 |
| 4  | hsa-miR-378a-3p | 240.31 | 180.44 |
| 5  | hsa-miR-1910-3p | 217.40 | 77.61  |
| 6  | hsa-miR-421     | 205.75 | 107.11 |
| 7  | hsa-miR-28-5p   | 185.08 | 160.06 |
| 8  | hsa-miR-3681-5p | 179.17 | 54.76  |
| 9  | hsa-miR-374b-5p | 146.77 | 97.05  |
| 10 | hsa-miR-6806-5p | 133.11 | 32.84  |
| 11 | hsa-miR-146b-5p | 125.42 | 62.17  |
| 12 | hsa-miR-320a    | 120.06 | 11.23  |
| 13 | hsa-miR-548e-3p | 116.69 | 68.97  |
| 14 | hsa-miR-1255a   | 107.96 | 90.27  |
| 15 | hsa-miR-4653-5p | 107.21 | 9.94   |
| 16 | hsa-miR-4298    | 102.29 | 33.42  |
| 17 | hsa-miR-4791    | 100.95 | 47.98  |
| 18 | hsa-miR-215-5p  | 99.50  | 73.15  |
| 19 | hsa-miR-4502    | 98.28  | 25.63  |
| 20 | hsa-miR-485-5p  | 85.04  | 15.14  |
| 21 | hsa-miR-580-3p  | 79.82  | 22.63  |
| 22 | hsa-miR-10a-5p  | 78.13  | 45.89  |
| 23 | hsa-miR-1246    | 77.06  | 43.85  |
| 24 | hsa-miR-3672    | 75.69  | 72.69  |
| 25 | hsa-miR-3613-3p | 71.96  | 40.91  |
| 26 | hsa-miR-4535    | 69.55  | 25.04  |
| 27 | hsa-miR-191-5p  | 62.58  | 11.94  |
| 28 | hsa-miR-10b-5p  | 61.22  | 21.15  |
| 29 | hsa-miR-1322    | 58.82  | 24.90  |
| 30 | hsa-miR-7703    | 55.20  | 11.13  |
| 31 | hsa-miR-4648    | 52.81  | 22.87  |
| 32 | hsa-miR-3688-5p | 50.45  | 44.18  |
| 33 | hsa-miR-183-5p  | 50.18  | 30.53  |
| 34 | hsa-miR-7153-5p | 50.14  | 19.35  |
| 35 | hsa-miR-559     | 50.09  | 15.98  |

|    |                  |       |       |
|----|------------------|-------|-------|
| 36 | hsa-miR-377-3p   | 49.57 | 18.77 |
| 37 | hsa-let-7f-5p    | 49.18 | 10.12 |
| 38 | hsa-miR-3662     | 48.97 | 29.93 |
| 39 | hsa-miR-628-5p   | 48.36 | 15.88 |
| 40 | hsa-miR-200b-3p  | 48.06 | 35.28 |
| 41 | hsa-miR-31-5p    | 46.62 | 27.05 |
| 42 | hsa-miR-1261     | 45.62 | 12.76 |
| 43 | hsa-miR-1914-5p  | 44.73 | 26.93 |
| 44 | hsa-miR-223-3p   | 43.20 | 23.00 |
| 45 | hsa-miR-3176     | 42.97 | 23.68 |
| 46 | hsa-miR-199b-5p  | 42.71 | 32.42 |
| 47 | hsa-miR-612      | 41.48 | 24.97 |
| 48 | hsa-miR-4668-5p  | 40.85 | 10.11 |
| 49 | hsa-miR-4527     | 40.62 | 21.86 |
| 50 | hsa-miR-888-5p   | 40.24 | 37.99 |
| 51 | hsa-miR-3128     | 37.03 | 18.24 |
| 52 | hsa-miR-22-3p    | 35.74 | 3.76  |
| 53 | hsa-miR-1468-3p  | 35.41 | 10.74 |
| 54 | hsa-miR-4524a-3p | 34.40 | 6.91  |
| 55 | hsa-miR-151a-3p  | 34.39 | 24.73 |
| 56 | hsa-miR-130b-3p  | 33.92 | 14.70 |
| 57 | hsa-let-7g-5p    | 33.36 | 16.17 |
| 58 | hsa-miR-5688     | 31.50 | 1.40  |
| 59 | hsa-miR-4468     | 30.80 | 20.43 |
| 60 | hsa-miR-539-3p   | 30.57 | 18.32 |
| 61 | hsa-miR-222-3p   | 30.29 | 15.51 |
| 62 | hsa-miR-877-5p   | 29.87 | 14.31 |
| 63 | hsa-miR-423-3p   | 29.64 | 13.29 |
| 64 | hsa-miR-605-3p   | 28.77 | 7.50  |
| 65 | hsa-miR-4778-5p  | 28.75 | 9.53  |
| 66 | hsa-miR-708-5p   | 28.38 | 16.10 |
| 67 | hsa-miR-501-3p   | 28.05 | 7.12  |
| 68 | hsa-miR-16-5p    | 27.63 | 17.75 |
| 69 | hsa-miR-6730-3p  | 26.63 | 8.86  |
| 70 | hsa-miR-3616-3p  | 25.98 | 19.64 |
| 71 | hsa-miR-4429     | 25.87 | 13.99 |
| 72 | hsa-miR-567      | 24.65 | 19.31 |
| 73 | hsa-miR-6788-5p  | 23.81 | 14.53 |
| 74 | hsa-let-7a-5p    | 23.77 | 6.71  |
| 75 | hsa-miR-181a-5p  | 22.24 | 12.79 |
| 76 | hsa-miR-363-3p   | 21.72 | 16.88 |

|     |                   |       |       |
|-----|-------------------|-------|-------|
| 77  | hsa-miR-7974      | 21.29 | 6.33  |
| 78  | hsa-miR-4517      | 21.13 | 1.72  |
| 79  | hsa-let-7e-5p     | 20.74 | 4.93  |
| 80  | hsa-miR-5190      | 19.48 | 7.43  |
| 81  | hsa-miR-340-5p    | 18.49 | 14.42 |
| 82  | hsa-miR-942-3p    | 18.47 | 5.35  |
| 83  | hsa-miR-577       | 18.09 | 4.84  |
| 84  | hsa-miR-3175      | 17.81 | 6.36  |
| 85  | hsa-miR-4711-5p   | 17.68 | 6.61  |
| 86  | hsa-miR-5683      | 17.39 | 3.69  |
| 87  | hsa-miR-181b-5p   | 17.31 | 9.31  |
| 88  | hsa-miR-671-5p    | 16.00 | 8.37  |
| 89  | hsa-miR-1273e     | 15.80 | 10.21 |
| 90  | hsa-miR-7151-3p   | 15.65 | 1.90  |
| 91  | hsa-miR-26a-5p    | 15.38 | 0.89  |
| 92  | hsa-miR-4530      | 14.81 | 6.46  |
| 93  | hsa-miR-152-3p    | 14.29 | 2.34  |
| 94  | hsa-miR-4454      | 14.09 | 4.33  |
| 95  | hsa-miR-3173-3p   | 13.69 | 7.87  |
| 96  | hsa-miR-423-5p    | 13.44 | 3.87  |
| 97  | hsa-miR-519e-5p   | 13.43 | 7.56  |
| 98  | hsa-miR-765       | 13.42 | 3.96  |
| 99  | hsa-miR-3605-5p   | 13.00 | 1.64  |
| 100 | hsa-miR-1258      | 12.96 | 1.40  |
| 101 | hsa-miR-641       | 12.90 | 6.17  |
| 102 | hsa-miR-4755-3p   | 12.87 | 7.78  |
| 103 | hsa-miR-431-5p    | 12.86 | 5.49  |
| 104 | hsa-miR-148a-5p   | 12.85 | 10.30 |
| 105 | hsa-miR-600       | 12.80 | 5.91  |
| 106 | hsa-miR-125b-2-3p | 12.78 | 9.07  |
| 107 | hsa-miR-3649      | 12.38 | 7.89  |
| 108 | hsa-miR-182-5p    | 12.37 | 4.86  |
| 109 | hsa-miR-744-5p    | 12.27 | 1.56  |
| 110 | hsa-miR-3119      | 12.27 | 3.07  |
| 111 | hsa-miR-27b-5p    | 12.22 | 5.95  |
| 112 | hsa-miR-506-3p    | 11.42 | 5.69  |
| 113 | hsa-miR-3945      | 11.36 | 8.09  |
| 114 | hsa-miR-550a-5p   | 11.26 | 2.66  |
| 115 | hsa-miR-192-5p    | 11.25 | 4.57  |
| 116 | hsa-miR-1185-1-3p | 11.14 | 8.01  |
| 117 | hsa-miR-6891-5p   | 11.04 | 1.54  |

|     |                 |       |      |
|-----|-----------------|-------|------|
| 118 | hsa-miR-7848-3p | 10.95 | 3.61 |
| 119 | hsa-miR-938     | 10.93 | 0.11 |
| 120 | hsa-miR-576-3p  | 10.71 | 1.98 |
| 121 | hsa-miR-6797-5p | 10.44 | 3.00 |
| 122 | hsa-miR-1277-3p | 10.37 | 6.07 |
| 123 | hsa-miR-130a-3p | 10.33 | 2.42 |
| 124 | hsa-miR-4753-5p | 9.97  | 4.81 |
| 125 | hsa-miR-28-3p   | 9.95  | 2.23 |
| 126 | hsa-miR-3646    | 9.71  | 3.27 |
| 127 | hsa-miR-3614-5p | 9.56  | 2.73 |
| 128 | hsa-miR-30a-5p  | 9.31  | 5.95 |
| 129 | hsa-miR-6734-3p | 9.09  | 5.50 |
| 130 | hsa-miR-5694    | 8.78  | 5.46 |
| 131 | hsa-miR-4484    | 8.77  | 1.69 |
| 132 | hsa-miR-4713-3p | 8.66  | 6.60 |
| 133 | hsa-miR-802     | 8.28  | 5.03 |
| 134 | hsa-miR-4750-5p | 8.23  | 2.07 |
| 135 | hsa-miR-371b-5p | 8.22  | 2.23 |
| 136 | hsa-miR-4754    | 8.14  | 2.43 |
| 137 | hsa-miR-6835-3p | 8.13  | 5.24 |
| 138 | hsa-miR-5089-5p | 8.07  | 0.21 |
| 139 | hsa-miR-6855-5p | 7.86  | 3.06 |
| 140 | hsa-miR-1197    | 7.80  | 3.04 |
| 141 | hsa-miR-6132    | 7.71  | 3.87 |
| 142 | hsa-miR-6784-3p | 7.54  | 5.37 |
| 143 | hsa-miR-30d-5p  | 7.49  | 0.78 |
| 144 | hsa-miR-484     | 7.42  | 0.23 |
| 145 | hsa-miR-372-3p  | 7.41  | 2.36 |
| 146 | hsa-miR-221-5p  | 7.41  | 1.06 |
| 147 | hsa-miR-4788    | 7.08  | 3.38 |
| 148 | hsa-miR-3682-3p | 6.89  | 5.00 |
| 149 | hsa-miR-2681-3p | 6.83  | 4.01 |
| 150 | hsa-miR-6722-5p | 6.79  | 2.45 |
| 151 | hsa-miR-4459    | 6.76  | 3.56 |
| 152 | hsa-miR-181c-3p | 6.69  | 4.07 |
| 153 | hsa-miR-3943    | 6.50  | 2.58 |
| 154 | hsa-miR-1912    | 6.42  | 1.62 |
| 155 | hsa-miR-1306-3p | 6.33  | 2.22 |
| 156 | hsa-miR-6772-5p | 6.31  | 4.49 |
| 157 | hsa-miR-1266-5p | 6.20  | 1.57 |
| 158 | hsa-miR-6720-5p | 6.20  | 3.37 |

|     |                  |      |      |
|-----|------------------|------|------|
| 159 | hsa-miR-4746-5p  | 6.08 | 3.60 |
| 160 | hsa-miR-7-2-3p   | 6.05 | 1.94 |
| 161 | hsa-miR-541-3p   | 5.99 | 2.25 |
| 162 | hsa-miR-6798-5p  | 5.97 | 1.90 |
| 163 | hsa-miR-6840-3p  | 5.79 | 4.47 |
| 164 | hsa-miR-4695-3p  | 5.68 | 2.31 |
| 165 | hsa-miR-6743-5p  | 5.66 | 1.36 |
| 166 | hsa-miR-409-5p   | 5.59 | 4.33 |
| 167 | hsa-miR-4700-5p  | 5.56 | 2.45 |
| 168 | hsa-miR-3161     | 5.53 | 2.31 |
| 169 | hsa-miR-5196-3p  | 5.44 | 1.36 |
| 170 | hsa-miR-5010-5p  | 5.42 | 3.40 |
| 171 | hsa-miR-7702     | 5.39 | 2.73 |
| 172 | hsa-miR-3121-3p  | 5.14 | 2.93 |
| 173 | hsa-miR-7977     | 5.10 | 1.29 |
| 174 | hsa-miR-4786-5p  | 5.08 | 2.33 |
| 175 | hsa-miR-25-3p    | 4.94 | 2.32 |
| 176 | hsa-miR-361-5p   | 4.84 | 2.21 |
| 177 | hsa-miR-6854-5p  | 4.84 | 2.58 |
| 178 | hsa-miR-937-3p   | 4.82 | 0.74 |
| 179 | hsa-miR-4516     | 4.77 | 1.29 |
| 180 | hsa-miR-3691-5p  | 4.76 | 1.57 |
| 181 | hsa-miR-30e-5p   | 4.71 | 1.90 |
| 182 | hsa-miR-1238-5p  | 4.69 | 1.48 |
| 183 | hsa-miR-3611     | 4.60 | 0.37 |
| 184 | hsa-miR-381-5p   | 4.50 | 2.03 |
| 185 | hsa-miR-370-3p   | 4.49 | 0.46 |
| 186 | hsa-miR-410-5p   | 4.49 | 1.29 |
| 187 | hsa-miR-128-1-5p | 4.37 | 0.45 |
| 188 | hsa-miR-8078     | 4.37 | 0.73 |
| 189 | hsa-miR-425-5p   | 4.28 | 0.92 |
| 190 | hsa-miR-6868-5p  | 4.27 | 2.18 |
| 191 | hsa-miR-4461     | 4.15 | 2.24 |
| 192 | hsa-miR-1909-3p  | 4.11 | 2.15 |
| 193 | hsa-miR-640      | 4.11 | 1.72 |
| 194 | hsa-miR-3914     | 4.10 | 0.22 |
| 195 | hsa-miR-3196     | 4.05 | 1.49 |
| 196 | hsa-miR-92a-3p   | 4.02 | 2.03 |
| 197 | hsa-miR-186-5p   | 3.97 | 1.14 |
| 198 | hsa-miR-3690     | 3.76 | 0.46 |
| 199 | hsa-miR-762      | 3.71 | 0.80 |

|     |                 |      |      |
|-----|-----------------|------|------|
| 200 | hsa-miR-542-3p  | 3.68 | 0.78 |
| 201 | hsa-miR-3200-5p | 3.67 | 0.31 |
| 202 | hsa-miR-9-3p    | 3.63 | 2.38 |
| 203 | hsa-miR-922     | 3.61 | 0.49 |
| 204 | hsa-miR-3944-3p | 3.50 | 1.30 |
| 205 | hsa-miR-6739-5p | 3.46 | 0.40 |
| 206 | hsa-miR-1249    | 3.37 | 0.96 |
| 207 | hsa-miR-3122    | 3.34 | 0.37 |
| 208 | hsa-miR-181c-5p | 3.34 | 0.54 |
| 209 | hsa-miR-6086    | 3.33 | 0.64 |
| 210 | hsa-miR-891a-5p | 3.29 | 1.07 |
| 211 | hsa-miR-6826-5p | 3.22 | 1.74 |
| 212 | hsa-miR-6079    | 3.19 | 1.22 |
| 213 | hsa-miR-1243    | 3.14 | 1.59 |
| 214 | hsa-miR-7107-5p | 3.02 | 1.05 |
| 215 | hsa-miR-4798-5p | 2.90 | 0.97 |
| 216 | hsa-miR-8058    | 2.85 | 0.31 |
| 217 | hsa-miR-761     | 2.78 | 1.67 |
| 218 | hsa-miR-6757-5p | 2.77 | 1.53 |
| 219 | hsa-miR-6839-5p | 2.74 | 0.59 |
| 220 | hsa-miR-5197-3p | 2.68 | 0.80 |
| 221 | hsa-miR-1253    | 2.68 | 0.37 |
| 222 | hsa-miR-4515    | 2.68 | 1.11 |
| 223 | hsa-miR-3147    | 2.65 | 1.55 |
| 224 | hsa-miR-6816-3p | 2.57 | 0.65 |
| 225 | hsa-miR-130b-5p | 2.46 | 0.28 |
| 226 | hsa-miR-128-3p  | 2.44 | 0.93 |
| 227 | hsa-miR-1286    | 2.43 | 0.89 |
| 228 | hsa-miR-3181    | 2.38 | 1.09 |
| 229 | hsa-miR-7847-3p | 2.38 | 0.88 |
| 230 | hsa-miR-1273c   | 2.38 | 0.61 |
| 231 | hsa-miR-92b-3p  | 2.32 | 0.61 |
| 232 | hsa-miR-769-3p  | 2.29 | 0.60 |
| 233 | hsa-miR-6809-5p | 2.27 | 0.48 |
| 234 | hsa-miR-143-3p  | 2.24 | 1.24 |
| 235 | hsa-miR-5693    | 2.20 | 0.54 |
| 236 | hsa-miR-6124    | 2.13 | 0.47 |
| 237 | hsa-miR-219b-3p | 2.12 | 0.63 |
| 238 | hsa-miR-26b-5p  | 2.12 | 0.29 |
| 239 | hsa-miR-7161-3p | 2.02 | 0.56 |
