# Supplementary material for: N6-Adenosine Methylation in MiRNAs
Source: PubMed Central journal article supplement (PMC4344304; doi:10.1371/journal.pone.0118438), 2015-02-27
Supplement: pone.0118438.s004.pdf [file pone.0118438.s004.pdf]

**Supplementary Table 4.**

List of the 46 motifs (3-mers) found to be significantly overrepresented in the immunoprecipitated miRNAs in comparison to the remaining miRNAs, as reported by MoSDi, sorted by score (decreasing).

|    | <b>motif</b> | <b>score (negative base-10 logarithm of p-value)</b> | <b>number of sequences with the motif column</b> | <b>p value</b> |
|----|--------------|------------------------------------------------------|--------------------------------------------------|----------------|
| 1  | RAA          | 7.31                                                 | 119                                              | 4.90E-08       |
| 2  | RAM          | 7.2936                                               | 170                                              | 5.09E-08       |
| 3  | RAH          | 7.158                                                | 202                                              | 6.95E-08       |
| 4  | YGA          | 7.0113                                               | 125                                              | 9.74E-08       |
| 5  | RAY          | 6.9782                                               | 186                                              | 1.05E-07       |
| 6  | AAS          | 6.675                                                | 128                                              | 2.11E-07       |
| 7  | TGA          | 6.3849                                               | 110                                              | 4.12E-07       |
| 8  | GAH          | 6.3417                                               | 175                                              | 4.55E-07       |
| 9  | RAW          | 6.2971                                               | 166                                              | 5.05E-07       |
| 10 | HMG          | 6.2516                                               | 223                                              | 5.60E-07       |
| 11 | YRA          | 6.2508                                               | 175                                              | 5.61E-07       |
| 12 | AAG          | 6.0456                                               | 94                                               | 9.00E-07       |
| 13 | DAA          | 5.9434                                               | 134                                              | 1.14E-06       |
| 14 | AAV          | 5.8723                                               | 136                                              | 1.34E-06       |
| 15 | VAA          | 5.8523                                               | 140                                              | 1.41E-06       |
| 16 | GAW          | 5.7734                                               | 137                                              | 1.69E-06       |
| 17 | BGA          | 5.7571                                               | 187                                              | 1.75E-06       |
| 18 | GAY          | 5.5561                                               | 135                                              | 2.78E-06       |
| 19 | GAM          | 5.5468                                               | 139                                              | 2.84E-06       |
| 20 | AHG          | 5.527                                                | 156                                              | 2.97E-06       |
| 21 | AWS          | 5.4874                                               | 186                                              | 3.26E-06       |
| 22 | AMG          | 5.4152                                               | 109                                              | 3.84E-06       |
| 23 | HGA          | 5.4121                                               | 165                                              | 3.87E-06       |
| 24 | SAA          | 5.276                                                | 129                                              | 5.30E-06       |
| 25 | AWG          | 5.2554                                               | 143                                              | 5.55E-06       |
| 26 | AAM          | 5.2071                                               | 96                                               | 6.21E-06       |
| 27 | AAK          | 5.1878                                               | 127                                              | 6.49E-06       |
| 28 | AAB          | 5.1782                                               | 152                                              | 6.63E-06       |
| 29 | ARA          | 5.1146                                               | 131                                              | 7.68E-06       |
| 30 | RAC          | 5.0676                                               | 119                                              | 8.56E-06       |
| 31 | RAR          | 5.0319                                               | 186                                              | 9.29E-06       |
| 32 | AAR          | 4.9595                                               | 112                                              | 1.10E-05       |

|    |     |        |     |          |
|----|-----|--------|-----|----------|
| 33 | GAA | 4.9479 | 88  | 1.13E-05 |
| 34 | WGA | 4.89   | 155 | 1.29E-05 |
| 35 | WRA | 4.8774 | 183 | 1.33E-05 |
| 36 | AMK | 4.8766 | 179 | 1.33E-05 |
| 37 | TRA | 4.8728 | 132 | 1.34E-05 |
| 38 | AWV | 4.8715 | 197 | 1.34E-05 |
| 39 | KGA | 4.8651 | 177 | 1.36E-05 |
| 40 | MRA | 4.8569 | 159 | 1.39E-05 |
| 41 | WAG | 4.847  | 136 | 1.42E-05 |
| 42 | HRA | 4.7917 | 200 | 1.62E-05 |
| 43 | GAD | 4.7842 | 185 | 1.64E-05 |
| 44 | SRA | 4.7651 | 184 | 1.72E-05 |
| 45 | WMG | 4.755  | 162 | 1.76E-05 |
| 46 | MGA | 4.7094 | 113 | 1.95E-05 |
