# Supplementary material for: N6-Adenosine Methylation in MiRNAs
Source: PubMed Central journal article supplement (PMC4344304; doi:10.1371/journal.pone.0118438), 2015-02-27
Supplement: pone.0118438.s005.pdf [file pone.0118438.s005.pdf]

**Supplementary Table 5.**

List of the top 50 motifs (4-mers) found to be significantly overrepresented in the immunoprecipitated miRNAs in comparison to the remaining miRNAs, as reported by MoSDi, sorted by score (decreasing).

|    | <b>motif</b> | <b>score (negative base-10 logarithm of p-value)</b> | <b>number of sequences with the motif column</b> | <b>p value</b> |
|----|--------------|------------------------------------------------------|--------------------------------------------------|----------------|
| 1  | ADRA         | 16.717                                               | 133                                              | 1.92E-17       |
| 2  | ANRA         | 15.3112                                              | 139                                              | 4.88E-16       |
| 3  | ABRA         | 14.0125                                              | 124                                              | 9.72E-15       |
| 4  | WVAA         | 13.9105                                              | 113                                              | 1.23E-14       |
| 5  | AKRA         | 13.719                                               | 112                                              | 1.91E-14       |
| 6  | WRAA         | 13.6199                                              | 94                                               | 2.40E-14       |
| 7  | AWRA         | 13.52                                                | 83                                               | 3.02E-14       |
| 8  | ADVA         | 13.2212                                              | 154                                              | 6.01E-14       |
| 9  | AHRA         | 13.0621                                              | 95                                               | 8.67E-14       |
| 10 | MBRA         | 12.9809                                              | 166                                              | 1.04E-13       |
| 11 | AWVA         | 12.936                                               | 104                                              | 1.16E-13       |
| 12 | MBGA         | 12.8053                                              | 129                                              | 1.57E-13       |
| 13 | ANVA         | 12.4478                                              | 165                                              | 3.57E-13       |
| 14 | MNRA         | 11.9903                                              | 184                                              | 1.02E-12       |
| 15 | HRAA         | 11.8907                                              | 104                                              | 1.29E-12       |
| 16 | HVAA         | 11.8671                                              | 122                                              | 1.36E-12       |
| 17 | ADRM         | 11.7492                                              | 174                                              | 1.78E-12       |
| 18 | WNAA         | 11.5685                                              | 117                                              | 2.70E-12       |
| 19 | WDAA         | 11.4052                                              | 100                                              | 3.93E-12       |
| 20 | ANDA         | 11.3384                                              | 154                                              | 4.59E-12       |
| 21 | ARRA         | 11.2592                                              | 107                                              | 5.51E-12       |
| 22 | HRAR         | 11.1588                                              | 166                                              | 6.94E-12       |
| 23 | ABDA         | 11.1446                                              | 141                                              | 7.17E-12       |
| 24 | AWGA         | 11.1345                                              | 59                                               | 7.34E-12       |
| 25 | ARAA         | 11.1249                                              | 65                                               | 7.50E-12       |
| 26 | MDRA         | 11.1079                                              | 173                                              | 7.80E-12       |
| 27 | AHVA         | 11.0628                                              | 120                                              | 8.65E-12       |
| 28 | ADDA         | 11.0355                                              | 142                                              | 9.22E-12       |
| 29 | AWVR         | 10.9682                                              | 150                                              | 1.08E-11       |
| 30 | ADGA         | 10.9342                                              | 94                                               | 1.16E-11       |
| 31 | RRAH         | 10.8211                                              | 168                                              | 1.51E-11       |
| 32 | AHGA         | 10.7953                                              | 62                                               | 1.60E-11       |

|    |      |         |     |          |
|----|------|---------|-----|----------|
| 33 | ANGM | 10.7581 | 142 | 1.75E-11 |
| 34 | AAVR | 10.748  | 99  | 1.79E-11 |
| 35 | ABVA | 10.7286 | 149 | 1.87E-11 |
| 36 | ATGA | 10.7159 | 38  | 1.92E-11 |
| 37 | AVAA | 10.705  | 76  | 1.97E-11 |
| 38 | ANGA | 10.6814 | 96  | 2.08E-11 |
| 39 | RVAY | 10.6682 | 181 | 2.15E-11 |
| 40 | ADAA | 10.6132 | 71  | 2.44E-11 |
| 41 | AYRA | 10.5987 | 66  | 2.52E-11 |
| 42 | MNGA | 10.5161 | 151 | 3.05E-11 |
| 43 | WDRA | 10.4974 | 172 | 3.18E-11 |
| 44 | AVRA | 10.4304 | 115 | 3.71E-11 |
| 45 | MYGA | 10.3841 | 86  | 4.13E-11 |
| 46 | ARVA | 10.3684 | 129 | 4.28E-11 |
| 47 | AHGM | 10.3351 | 94  | 4.62E-11 |
| 48 | AYGA | 10.3033 | 42  | 4.97E-11 |
| 49 | MKGA | 10.255  | 117 | 5.56E-11 |
| 50 | ADVM | 10.2517 | 199 | 5.60E-11 |
