# Supplementary material for: N6-Adenosine Methylation in MiRNAs
Source: PubMed Central journal article supplement (PMC4344304; doi:10.1371/journal.pone.0118438), 2015-02-27
Supplement: pone.0118438.s006.pdf [file pone.0118438.s006.pdf]

**Supplementary Table 6.**

List of the top 50 motifs (5-mers) found to be significantly overrepresented in the immunoprecipitated miRNAs in comparison to the remaining miRNAs, as reported by MoSDi, sorted by score (decreasing).

|    | <b>motif</b> | <b>score (negative base-10 logarithm of p-value)</b> | <b>number of sequences with the motif column</b> | <b>p value</b> |
|----|--------------|------------------------------------------------------|--------------------------------------------------|----------------|
| 1  | ADRAB        | 19.3887                                              | 122                                              | 4.09E-20       |
| 2  | ADRAN        | 16.8124                                              | 129                                              | 1.54E-17       |
| 3  | AKRAB        | 16.8053                                              | 99                                               | 1.57E-17       |
| 4  | ANRAB        | 15.8759                                              | 124                                              | 1.33E-16       |
| 5  | NADRA        | 15.852                                               | 127                                              | 1.41E-16       |
| 6  | DADRA        | 15.7829                                              | 104                                              | 1.65E-16       |
| 7  | ADRAK        | 15.657                                               | 95                                               | 2.20E-16       |
| 8  | AHRAD        | 15.5798                                              | 87                                               | 2.63E-16       |
| 9  | ADRAY        | 15.5017                                              | 83                                               | 3.15E-16       |
| 10 | ARRAB        | 15.1926                                              | 101                                              | 6.42E-16       |
| 11 | DAKRA        | 15.0755                                              | 91                                               | 8.40E-16       |
| 12 | AKRAY        | 15.0183                                              | 67                                               | 9.59E-16       |
| 13 | ADVAK        | 14.8974                                              | 117                                              | 1.27E-15       |
| 14 | RWWGV        | 14.8926                                              | 141                                              | 1.28E-15       |
| 15 | DABRA        | 14.7325                                              | 101                                              | 1.85E-15       |
| 16 | RABRA        | 14.7159                                              | 84                                               | 1.92E-15       |
| 17 | AWVAD        | 14.6676                                              | 91                                               | 2.15E-15       |
| 18 | RHRAA        | 14.6476                                              | 72                                               | 2.25E-15       |
| 19 | DANRA        | 14.6115                                              | 111                                              | 2.45E-15       |
| 20 | RANRA        | 14.6022                                              | 93                                               | 2.50E-15       |
| 21 | ANRAD        | 14.5775                                              | 118                                              | 2.65E-15       |
| 22 | ADRAH        | 14.4975                                              | 100                                              | 3.18E-15       |
| 23 | RADRA        | 14.4649                                              | 86                                               | 3.43E-15       |
| 24 | GDRA         | 14.4193                                              | 101                                              | 3.81E-15       |
| 25 | AWRAK        | 14.3876                                              | 61                                               | 4.10E-15       |
| 26 | AWRAD        | 14.3796                                              | 72                                               | 4.17E-15       |
| 27 | WRAAB        | 14.3347                                              | 86                                               | 4.63E-15       |
| 28 | RWHGV        | 14.3084                                              | 151                                              | 4.92E-15       |
| 29 | AWVAK        | 14.2797                                              | 78                                               | 5.25E-15       |
| 30 | WVAAN        | 14.2215                                              | 111                                              | 6.01E-15       |
| 31 | AHRVR        | 14.2158                                              | 136                                              | 6.08E-15       |
| 32 | RWRAA        | 14.2157                                              | 61                                               | 6.09E-15       |
| 33 | AHRAR        | 14.1776                                              | 70                                               | 6.64E-15       |

|    |       |         |     |          |
|----|-------|---------|-----|----------|
| 34 | VWRA  | 14.175  | 144 | 6.68E-15 |
| 35 | DADRM | 14.1423 | 146 | 7.21E-15 |
| 36 | RAHRR | 14.1014 | 115 | 7.92E-15 |
| 37 | ANRAK | 14.1004 | 100 | 7.94E-15 |
| 38 | RWVAA | 14.0829 | 72  | 8.26E-15 |
| 39 | RHRRA | 14.0748 | 131 | 8.42E-15 |
| 40 | ADRMK | 14.0539 | 127 | 8.83E-15 |
| 41 | ADGMK | 14.0458 | 96  | 9.00E-15 |
| 42 | RAKRA | 14.0079 | 75  | 9.82E-15 |
| 43 | ABRAB | 13.9731 | 104 | 1.06E-14 |
| 44 | KADRA | 13.948  | 88  | 1.13E-14 |
| 45 | AHRRR | 13.9477 | 117 | 1.13E-14 |
| 46 | WVAAB | 13.9362 | 100 | 1.16E-14 |
| 47 | ABRAN | 13.886  | 121 | 1.30E-14 |
| 48 | AKRAN | 13.8753 | 109 | 1.33E-14 |
| 49 | VHRAA | 13.8705 | 92  | 1.35E-14 |
| 50 | WRRAB | 13.8583 | 147 | 1.39E-14 |
