# Supplementary material for: N6-Adenosine Methylation in MiRNAs
Source: PubMed Central journal article supplement (PMC4344304; doi:10.1371/journal.pone.0118438), 2015-02-27
Supplement: pone.0118438.s007.pdf [file pone.0118438.s007.pdf]

**Supplementary Table 7.**

List of the top 50 motifs (3-mers) found to be discriminating between immunoprecipitated miRNAs and remaining miRNAs by Fisher's exact test on the number of sequences with and without the motif in immunoprecipitated and remaining miRNAs.

|    | motif | Fisher p-value | % of IPed miRNAs with motif | % of remaining miRNAs with motif | % of all miRNAs with motif | ratio (IPed/remaining) | difference (IPed-remaining) |
|----|-------|----------------|-----------------------------|----------------------------------|----------------------------|------------------------|-----------------------------|
| 1  | AAB   | 4.71E-06       | 63.60%                      | 48.00%                           | 49.40%                     | 1.326                  | 15.6                        |
| 2  | AAD   | 1.42E-05       | 56.10%                      | 41.40%                           | 42.70%                     | 1.355                  | 14.7                        |
| 3  | AAG   | 1.11E-05       | 39.30%                      | 25.60%                           | 26.90%                     | 1.536                  | 13.7                        |
| 4  | AAH   | 1.65E-05       | 50.20%                      | 35.80%                           | 37.10%                     | 1.403                  | 14.4                        |
| 5  | AAS   | 5.53E-06       | 53.60%                      | 38.10%                           | 39.50%                     | 1.406                  | 15.5                        |
| 6  | AAV   | 5.34E-06       | 56.90%                      | 41.50%                           | 42.90%                     | 1.373                  | 15.5                        |
| 7  | ABR   | 5.68E-07       | 89.50%                      | 76.10%                           | 77.30%                     | 1.177                  | 13.5                        |
| 8  | AGR   | 5.13E-07       | 70.70%                      | 53.90%                           | 55.50%                     | 1.311                  | 16.8                        |
| 9  | AHD   | 2.11E-06       | 91.20%                      | 79.10%                           | 80.20%                     | 1.153                  | 12.1                        |
| 10 | AHG   | 9.16E-06       | 65.30%                      | 50.30%                           | 51.70%                     | 1.299                  | 15                          |
| 11 | AHK   | 1.56E-05       | 85.80%                      | 73.40%                           | 74.60%                     | 1.169                  | 12.4                        |
| 12 | AKV   | 1.50E-05       | 92.10%                      | 81.60%                           | 82.60%                     | 1.128                  | 10.4                        |
| 13 | AMB   | 8.49E-06       | 83.30%                      | 70.10%                           | 71.30%                     | 1.188                  | 13.2                        |
| 14 | AMD   | 1.46E-06       | 82.40%                      | 67.70%                           | 69.10%                     | 1.217                  | 14.7                        |
| 15 | AMK   | 1.39E-06       | 74.90%                      | 59.20%                           | 60.60%                     | 1.266                  | 15.7                        |
| 16 | ARA   | 3.10E-06       | 54.80%                      | 39.00%                           | 40.50%                     | 1.406                  | 15.8                        |
| 17 | ARD   | 1.57E-05       | 87.90%                      | 76.00%                           | 77.10%                     | 1.156                  | 11.9                        |
| 18 | ARR   | 2.31E-07       | 81.60%                      | 65.70%                           | 67.20%                     | 1.242                  | 15.9                        |
| 19 | ASD   | 5.55E-08       | 95.00%                      | 82.60%                           | 83.80%                     | 1.15                   | 12.4                        |
| 20 | ASK   | 4.19E-06       | 87.00%                      | 74.20%                           | 75.40%                     | 1.173                  | 12.8                        |
| 21 | ASR   | 6.44E-07       | 81.60%                      | 66.20%                           | 67.70%                     | 1.232                  | 15.4                        |
| 22 | AVD   | 1.21E-06       | 96.20%                      | 86.20%                           | 87.20%                     | 1.116                  | 10                          |
| 23 | AVG   | 7.43E-06       | 70.70%                      | 55.80%                           | 57.20%                     | 1.267                  | 14.9                        |
| 24 | AVK   | 1.07E-07       | 93.70%                      | 81.00%                           | 82.20%                     | 1.158                  | 12.8                        |
| 25 | AVR   | 2.22E-06       | 87.90%                      | 74.70%                           | 76.00%                     | 1.176                  | 13.1                        |
| 26 | AWB   | 1.05E-05       | 83.70%                      | 70.70%                           | 71.90%                     | 1.183                  | 13                          |
| 27 | AWG   | 1.61E-05       | 59.80%                      | 45.00%                           | 46.40%                     | 1.33                   | 14.8                        |
| 28 | AWS   | 3.47E-06       | 77.80%                      | 63.00%                           | 64.30%                     | 1.236                  | 14.9                        |
| 29 | AWV   | 2.71E-07       | 82.40%                      | 66.80%                           | 68.30%                     | 1.234                  | 15.6                        |
| 30 | AYD   | 1.55E-05       | 83.30%                      | 70.40%                           | 71.60%                     | 1.183                  | 12.9                        |
| 31 | BBT   | 4.36E-07       | 83.70%                      | 93.80%                           | 92.80%                     | 0.892                  | -10.1                       |
| 32 | BGA   | 1.06E-09       | 78.20%                      | 58.60%                           | 60.40%                     | 1.335                  | 19.7                        |

|    |     |          |        |        |        |       |       |
|----|-----|----------|--------|--------|--------|-------|-------|
| 33 | BGR | 5.12E-07 | 91.20% | 78.40% | 79.60% | 1.164 | 12.8  |
| 34 | BKT | 2.74E-06 | 65.30% | 79.10% | 77.80% | 0.825 | -13.8 |
| 35 | BKY | 3.89E-07 | 90.80% | 97.80% | 97.10% | 0.929 | -7    |
| 36 | BRA | 1.14E-08 | 90.00% | 74.50% | 76.00% | 1.207 | 15.4  |
| 37 | BTY | 6.64E-06 | 62.30% | 76.30% | 75.00% | 0.818 | -13.9 |
| 38 | DAA | 5.46E-07 | 56.10% | 39.10% | 40.70% | 1.433 | 16.9  |
| 39 | DAH | 7.71E-09 | 90.00% | 74.30% | 75.80% | 1.211 | 15.6  |
| 40 | DAM | 1.30E-06 | 77.80% | 62.30% | 63.80% | 1.248 | 15.5  |
| 41 | DAW | 1.98E-07 | 76.60% | 59.70% | 61.30% | 1.283 | 16.9  |
| 42 | DAY | 3.93E-08 | 84.10% | 67.60% | 69.10% | 1.245 | 16.5  |
| 43 | DGA | 5.98E-09 | 82.80% | 65.00% | 66.70% | 1.274 | 17.8  |
| 44 | DRA | 1.39E-07 | 88.70% | 74.30% | 75.60% | 1.194 | 14.4  |
| 45 | DSA | 3.35E-07 | 97.10% | 87.00% | 87.90% | 1.116 | 10.1  |
| 46 | GAA | 1.32E-06 | 36.80% | 22.20% | 23.60% | 1.656 | 14.6  |
| 47 | GAB | 4.88E-08 | 76.20% | 58.30% | 60.00% | 1.306 | 17.9  |
| 48 | GAD | 4.02E-09 | 77.40% | 58.30% | 60.10% | 1.327 | 19.1  |
| 49 | GAH | 1.51E-10 | 73.20% | 51.90% | 53.90% | 1.411 | 21.3  |
| 50 | GAK | 3.37E-06 | 64.40% | 48.60% | 50.10% | 1.327 | 15.9  |
