# Supplementary material for: N6-Adenosine Methylation in MiRNAs
Source: PubMed Central journal article supplement (PMC4344304; doi:10.1371/journal.pone.0118438), 2015-02-27
Supplement: pone.0118438.s008.pdf [file pone.0118438.s008.pdf]

**Supplementary Table 8.**

List of the top 50 motifs (4-mers) found to be discriminating between immunoprecipitated miRNAs and remaining miRNAs by Fisher's exact test on the number of sequences with and without the motif in immunoprecipitated and remaining miRNAs.

|    | <b>motif</b> | <b>Fisher p-value</b> | <b>% of IPed miRNAs with motif</b> | <b>% of remaining miRNAs with motif</b> | <b>% of all miRNAs with motif</b> | <b>ratio (IPed/remaining)</b> | <b>difference (IPed-remaining)</b> |
|----|--------------|-----------------------|------------------------------------|-----------------------------------------|-----------------------------------|-------------------------------|------------------------------------|
| 1  | AABR         | 2.60E-07              | 41.80%                             | 25.70%                                  | 27.20%                            | 1.629                         | 16.2                               |
| 2  | AAGV         | 6.92E-07              | 32.20%                             | 18.00%                                  | 19.30%                            | 1.789                         | 14.2                               |
| 3  | AAND         | 9.30E-07              | 57.30%                             | 40.70%                                  | 42.30%                            | 1.408                         | 16.6                               |
| 4  | AANR         | 1.14E-06              | 47.70%                             | 31.70%                                  | 33.20%                            | 1.505                         | 16                                 |
| 5  | AARR         | 1.05E-06              | 35.10%                             | 20.70%                                  | 22.00%                            | 1.699                         | 14.5                               |
| 6  | AASR         | 6.22E-07              | 33.10%                             | 18.70%                                  | 20.00%                            | 1.772                         | 14.4                               |
| 7  | AASV         | 8.11E-07              | 42.70%                             | 27.00%                                  | 28.50%                            | 1.581                         | 15.7                               |
| 8  | AAVR         | 3.69E-07              | 41.40%                             | 25.50%                                  | 27.00%                            | 1.623                         | 15.9                               |
| 9  | ABAA         | 1.54E-07              | 26.40%                             | 12.90%                                  | 14.20%                            | 2.042                         | 13.4                               |
| 10 | ABAH         | 8.79E-07              | 50.60%                             | 34.30%                                  | 35.80%                            | 1.477                         | 16.3                               |
| 11 | ABAW         | 2.24E-07              | 41.80%                             | 25.50%                                  | 27.00%                            | 1.642                         | 16.4                               |
| 12 | ABDA         | 5.43E-12              | 59.00%                             | 35.70%                                  | 37.90%                            | 1.652                         | 23.3                               |
| 13 | ABDM         | 8.22E-08              | 77.80%                             | 60.70%                                  | 62.30%                            | 1.283                         | 17.2                               |
| 14 | ABGA         | 1.47E-09              | 34.30%                             | 17.00%                                  | 18.60%                            | 2.017                         | 17.3                               |
| 15 | ABGM         | 1.01E-08              | 49.40%                             | 30.50%                                  | 32.30%                            | 1.617                         | 18.8                               |
| 16 | ABNA         | 1.65E-10              | 67.80%                             | 46.20%                                  | 48.20%                            | 1.469                         | 21.6                               |
| 17 | ABNW         | 4.41E-08              | 89.50%                             | 74.70%                                  | 76.00%                            | 1.199                         | 14.9                               |
| 18 | ABRA         | 1.28E-14              | 51.90%                             | 26.90%                                  | 29.20%                            | 1.929                         | 25                                 |
| 19 | ABRH         | 8.98E-09              | 79.50%                             | 61.20%                                  | 62.90%                            | 1.298                         | 18.3                               |
| 20 | ABRM         | 4.04E-11              | 68.60%                             | 46.30%                                  | 48.40%                            | 1.482                         | 22.3                               |
| 21 | ABRN         | 9.59E-07              | 88.30%                             | 74.80%                                  | 76.00%                            | 1.181                         | 13.5                               |
| 22 | ABRW         | 6.37E-08              | 66.50%                             | 48.20%                                  | 49.90%                            | 1.381                         | 18.3                               |
| 23 | ABSA         | 1.07E-06              | 47.30%                             | 31.30%                                  | 32.80%                            | 1.51                          | 16                                 |
| 24 | ABVA         | 7.75E-12              | 62.30%                             | 39.20%                                  | 41.40%                            | 1.59                          | 23.1                               |
| 25 | ABVM         | 9.51E-08              | 80.80%                             | 64.10%                                  | 65.70%                            | 1.259                         | 16.6                               |
| 26 | ABVW         | 2.68E-08              | 82.80%                             | 65.80%                                  | 67.40%                            | 1.259                         | 17                                 |
| 27 | ADAA         | 6.96E-09              | 29.70%                             | 14.20%                                  | 15.70%                            | 2.085                         | 15.5                               |
| 28 | ADAH         | 1.97E-07              | 51.90%                             | 34.50%                                  | 36.10%                            | 1.504                         | 17.4                               |
| 29 | ADAM         | 1.35E-07              | 41.80%                             | 25.20%                                  | 26.80%                            | 1.659                         | 16.6                               |
| 30 | ADAR         | 2.40E-07              | 44.80%                             | 28.20%                                  | 29.70%                            | 1.588                         | 16.6                               |
| 31 | ADAV         | 9.14E-07              | 54.00%                             | 37.40%                                  | 38.90%                            | 1.443                         | 16.6                               |
| 32 | ADAW         | 2.03E-07              | 41.40%                             | 25.10%                                  | 26.70%                            | 1.648                         | 16.3                               |

|    |      |          |        |        |        |       |      |
|----|------|----------|--------|--------|--------|-------|------|
| 33 | ADDA | 4.00E-12 | 59.40% | 36.10% | 38.30% | 1.646 | 23.3 |
| 34 | ADDM | 1.66E-07 | 77.80% | 61.10% | 62.60% | 1.275 | 16.8 |
| 35 | ADGA | 2.35E-10 | 39.30% | 20.30% | 22.10% | 1.938 | 19   |
| 36 | ADGM | 7.47E-10 | 56.90% | 36.10% | 38.10% | 1.575 | 20.8 |
| 37 | ADNA | 2.60E-10 | 66.90% | 45.60% | 47.60% | 1.47  | 21.4 |
| 38 | ADRA | 3.17E-15 | 55.60% | 29.60% | 32.10% | 1.879 | 26   |
| 39 | ADRM | 1.58E-11 | 72.80% | 50.30% | 52.40% | 1.447 | 22.5 |
| 40 | ADRR | 5.76E-08 | 70.70% | 52.50% | 54.20% | 1.346 | 18.2 |
| 41 | ADSA | 2.02E-09 | 52.70% | 32.70% | 34.60% | 1.611 | 20   |
| 42 | ADSM | 3.11E-08 | 73.60% | 55.30% | 57.00% | 1.331 | 18.3 |
| 43 | ADVA | 1.10E-12 | 64.40% | 40.20% | 42.50% | 1.603 | 24.2 |
| 44 | ADVМ | 1.55E-09 | 83.30% | 64.60% | 66.40% | 1.288 | 18.6 |
| 45 | ADVR | 4.39E-07 | 78.20% | 62.10% | 63.60% | 1.26  | 16.2 |
| 46 | ADVW | 1.76E-07 | 81.20% | 64.90% | 66.50% | 1.25  | 16.2 |
| 47 | ADWA | 2.44E-07 | 38.10% | 22.30% | 23.80% | 1.706 | 15.8 |
| 48 | AGAA | 5.19E-07 | 17.60% | 7.10%  | 8.10%  | 2.482 | 10.5 |
| 49 | AGAH | 4.17E-08 | 34.70% | 18.80% | 20.30% | 1.849 | 15.9 |
| 50 | AGAM | 2.32E-07 | 26.80% | 13.40% | 14.60% | 2.001 | 13.4 |
