# Supplementary material for: N6-Adenosine Methylation in MiRNAs
Source: PubMed Central journal article supplement (PMC4344304; doi:10.1371/journal.pone.0118438), 2015-02-27
Supplement: pone.0118438.s009.pdf [file pone.0118438.s009.pdf]

**Supplementary Table 9.**

List of the top 50 motifs found to be discriminating between immunoprecipitated miRNAs and remaining miRNAs by Fisher's exact test on the number of sequences with and without the motif in immunoprecipitated and remaining miRNAs.

|    | <b>motif</b> | <b>Fisher p-value</b> | <b>% of IPed miRNAs with motif</b> | <b>% of remaining miRNAs with motif</b> | <b>% of all miRNAs with motif</b> | <b>ratio (IPed/remaining)</b> | <b>difference (IPed-remaining)</b> |
|----|--------------|-----------------------|------------------------------------|-----------------------------------------|-----------------------------------|-------------------------------|------------------------------------|
| 1  | AABGA        | 6.15E-08              | 11.70%                             | 3.20%                                   | 4.00%                             | 3.667                         | 8.5                                |
| 2  | AABRA        | 4.35E-08              | 16.70%                             | 5.90%                                   | 6.90%                             | 2.85                          | 10.9                               |
| 3  | AABRD        | 2.04E-08              | 35.60%                             | 19.20%                                  | 20.70%                            | 1.855                         | 16.4                               |
| 4  | AABRN        | 4.82E-08              | 41.80%                             | 24.70%                                  | 26.30%                            | 1.691                         | 17.1                               |
| 5  | AABRR        | 5.70E-09              | 27.60%                             | 12.50%                                  | 13.90%                            | 2.205                         | 15.1                               |
| 6  | AABRV        | 2.20E-08              | 34.70%                             | 18.50%                                  | 20.00%                            | 1.875                         | 16.2                               |
| 7  | AADGA        | 4.52E-08              | 14.60%                             | 4.70%                                   | 5.70%                             | 3.083                         | 9.9                                |
| 8  | AADGM        | 4.18E-08              | 21.80%                             | 9.20%                                   | 10.40%                            | 2.366                         | 12.6                               |
| 9  | AADGV        | 1.19E-08              | 28.00%                             | 13.20%                                  | 14.60%                            | 2.129                         | 14.9                               |
| 10 | AADRA        | 6.21E-08              | 18.80%                             | 7.40%                                   | 8.50%                             | 2.55                          | 11.4                               |
| 11 | AAKRR        | 5.70E-08              | 23.40%                             | 10.40%                                  | 11.60%                            | 2.252                         | 13                                 |
| 12 | AANGA        | 9.28E-09              | 15.50%                             | 4.90%                                   | 5.90%                             | 3.173                         | 10.6                               |
| 13 | AANGM        | 3.03E-09              | 23.80%                             | 9.70%                                   | 11.00%                            | 2.455                         | 14.1                               |
| 14 | AANGR        | 3.10E-08              | 23.00%                             | 9.90%                                   | 11.20%                            | 2.317                         | 13.1                               |
| 15 | AANGV        | 1.55E-09              | 30.10%                             | 14.00%                                  | 15.50%                            | 2.153                         | 16.1                               |
| 16 | AANRA        | 2.43E-08              | 20.50%                             | 8.10%                                   | 9.20%                             | 2.539                         | 12.4                               |
| 17 | AANRD        | 7.86E-08              | 41.80%                             | 24.90%                                  | 26.50%                            | 1.679                         | 16.9                               |
| 18 | AANRR        | 2.48E-08              | 33.10%                             | 17.20%                                  | 18.70%                            | 1.919                         | 15.8                               |
| 19 | AANRV        | 6.67E-08              | 40.20%                             | 23.40%                                  | 25.00%                            | 1.716                         | 16.8                               |
| 20 | AARGM        | 4.88E-08              | 18.80%                             | 7.30%                                   | 8.40%                             | 2.58                          | 11.5                               |
| 21 | AARGV        | 6.80E-09              | 23.40%                             | 9.80%                                   | 11.00%                            | 2.401                         | 13.7                               |
| 22 | AARVA        | 6.86E-08              | 20.90%                             | 8.70%                                   | 9.90%                             | 2.399                         | 12.2                               |
| 23 | AASRR        | 2.60E-08              | 22.20%                             | 9.30%                                   | 10.50%                            | 2.378                         | 12.8                               |
| 24 | AASRV        | 3.81E-08              | 28.50%                             | 13.80%                                  | 15.20%                            | 2.059                         | 14.6                               |
| 25 | AASVD        | 6.56E-08              | 36.40%                             | 20.40%                                  | 21.90%                            | 1.786                         | 16                                 |
| 26 | AAVGM        | 3.58E-09              | 20.90%                             | 7.90%                                   | 9.10%                             | 2.662                         | 13.1                               |
| 27 | AAVGV        | 1.88E-09              | 25.50%                             | 10.70%                                  | 12.10%                            | 2.384                         | 14.8                               |
| 28 | AAVRD        | 8.54E-08              | 36.00%                             | 20.10%                                  | 21.60%                            | 1.792                         | 15.9                               |
| 29 | ABDAK        | 1.32E-09              | 38.50%                             | 20.40%                                  | 22.10%                            | 1.889                         | 18.1                               |
| 30 | ABDAN        | 4.25E-12              | 57.70%                             | 34.50%                                  | 36.70%                            | 1.672                         | 23.2                               |
| 31 | ABDAS        | 8.10E-08              | 38.10%                             | 21.80%                                  | 23.30%                            | 1.746                         | 16.3                               |
| 32 | ABDAY        | 4.67E-08              | 31.80%                             | 16.60%                                  | 18.00%                            | 1.918                         | 15.2                               |

|    |       |          |        |        |        |       |      |
|----|-------|----------|--------|--------|--------|-------|------|
| 33 | ABDMK | 1.44E-09 | 55.20% | 34.90% | 36.80% | 1.581 | 20.3 |
| 34 | ABDMN | 6.77E-08 | 76.60% | 59.10% | 60.70% | 1.296 | 17.5 |
| 35 | ABDRR | 1.86E-08 | 65.70% | 46.50% | 48.30% | 1.413 | 19.2 |
| 36 | ABGAB | 1.64E-10 | 29.30% | 12.70% | 14.20% | 2.315 | 16.6 |
| 37 | ABGAD | 2.65E-08 | 28.00% | 13.40% | 14.80% | 2.088 | 14.6 |
| 38 | ABGAH | 9.89E-11 | 25.90% | 10.20% | 11.70% | 2.546 | 15.8 |
| 39 | ABGAK | 2.53E-08 | 23.00% | 9.80%  | 11.00% | 2.348 | 13.2 |
| 40 | ABGAN | 2.40E-10 | 33.90% | 16.10% | 17.80% | 2.099 | 17.7 |
| 41 | ABGAV | 6.04E-08 | 27.20% | 13.10% | 14.40% | 2.072 | 14.1 |
| 42 | ABGAW | 4.37E-08 | 18.80% | 7.30%  | 8.30%  | 2.596 | 11.6 |
| 43 | ABGAY | 7.57E-10 | 19.20% | 6.50%  | 7.70%  | 2.952 | 12.7 |
| 44 | ABGMB | 1.89E-10 | 41.00% | 21.50% | 23.40% | 1.903 | 19.5 |
| 45 | ABGMD | 1.95E-08 | 41.00% | 23.60% | 25.20% | 1.736 | 17.4 |
| 46 | ABGMH | 4.14E-08 | 38.90% | 22.20% | 23.80% | 1.75  | 16.7 |
| 47 | ABGMK | 2.18E-09 | 32.20% | 15.50% | 17.10% | 2.073 | 16.7 |
| 48 | ABGMN | 1.05E-08 | 47.70% | 29.10% | 30.80% | 1.639 | 18.6 |
| 49 | ABGMY | 1.90E-08 | 29.30% | 14.20% | 15.70% | 2.056 | 15   |
| 50 | ABKMK | 4.58E-08 | 43.10% | 25.80% | 27.40% | 1.672 | 17.3 |
